# Supplementary material
Source: PubMed Central journal article supplement (PMC3258587)
Supplement: 1119058109_sapp.pdf [file 1119058109_sapp.pdf]

## Supporting Information Appendix

### Multiple independent introductions of *Plasmodium falciparum* in South

### America

#### Yalcindag *et al.*

| <b>Index</b>                                                                      | <b>Page</b> |
|-----------------------------------------------------------------------------------|-------------|
| SI Material and Methods                                                           | S2-S4       |
| SI References                                                                     | S5-S6       |
| <b>Fig. S1.</b> $F_{ST}$ values plotted against heterozygosity                    | S7          |
| <b>Fig. S2.</b> Isolation by distance (IBD) within each continent.                | S8          |
| <b>Fig. S3.</b> Genetic relationship between the South American populations       | S9          |
| <b>Fig. S4.</b> Neighbor-joining trees of populations                             | S10         |
| <b>Fig. S5.</b> Neighbor-joining trees of populations                             | S11         |
| <b>Fig. S6.</b> Neighbor-joining trees of populations                             | S12         |
| <b>Fig. S7.</b> Genetic relationship between South American populations vs.       | S13         |
| <b>Fig. S8.</b> Neighbor-joining trees of individuals                             | S14         |
| <b>Fig. S9.</b> Genetic relationship between South American populations vs.       | S15         |
| <b>Fig. S10.</b> Neighbor-joining trees of populations                            | S16         |
| <b>Fig. S11.</b> Genetic relationship between South American populations vs.      | S17         |
| <b>Fig. S12.</b> Neighbor-joining trees of population relationships               | S18         |
| <b>Fig. S13.</b> Three scenarios tested in the ABC analysis.                      | S19         |
| <b>Table S1.</b> Characteristics of the <i>Plasmodium falciparum</i> samples      | S20-S21     |
| <b>Table S2.</b> The 12 <i>P. falciparum</i> microsatellite loci with marker code | S22         |
| <b>Table S3.</b> Characteristics of the 272 Single Nucleotide Polymorphisms       | S23-S29     |
| <b>Table S4.</b> SNPs under selection                                             | S30-S31     |
| <b>Table S5.</b> Expected heterozygosity                                          | S32         |
| <b>Table S6.</b> Probabilities (with 95% confidence intervals in brackets)        | S33-S34     |
| <b>Table S7.</b> Range of prior distributions of the parameters                   | S35         |

## SI Material and Methods

**Microsatellite and SNP Genotyping.** DNA from blood samples was extracted using the DNeasy Blood and Tissue kit (Qiagen, France) according to the manufacturer's recommendations, and eluted in 100  $\mu$ l of elution buffer per 200  $\mu$ l of whole blood or per filter blot. The extracted DNA was used as template for the PCR-based amplification of 12 polymorphic microsatellites distributed among eight of the 14 chromosomes of *P. falciparum* (listed in Table S2), as well as SNPs from coding and non-coding regions (Table S3). For microsatellite amplification, a two-step semi-nested PCR strategy with fluorescent end-labeled primers was used as in (1), following the methodology in (2). The amplified microsatellite repeats were resolved and sized relative to an internal size standard using a Genetic Analyzer 3130xl and the GeneMapper software. For SNPs, genotyping was performed by the Integragen Company (Evry, France) using the Illumina Golden Gate technology. We obtained interpretable genotypes for 354 of the 384 SNPs initially defined. To minimize missing data while maximizing information, we retained only the isolates that were genotyped for at least 80% of the 354 SNPs and when SNPs were successfully typed in at least 90% of the isolates. The resulting sample consisted of a dataset of 210 isolates genotyped at 272 SNPs (Table S3 for a list of SNPs) from 17 populations in 13 countries (Table S1).

**Markers under natural selection.** Natural selection, either divergent or convergent, may impact genetic frequencies differently in different populations. We searched for loci (microsatellites and SNPs) that could be under positive or balancing selection, using the method developed in (3) and implemented in the program LOSITAN (4). Outlier values of genetic differentiation at specific loci were detected by running coalescent simulations to generate the expected distribution of Wright's inbreeding coefficient  $F_{ST}$  as a function of heterozygosity ( $He$ ). The distribution of  $F_{ST}$  was obtained by simulating an island model with a distribution centered on the empirical estimates averaged over loci. This average  $F_{ST}$  cannot be assumed to be neutral because (initially unknown) selected loci may be included in the computation. We first ran LOSITAN to determine a subset of candidate selected loci and then removed them for the computation of the neutral  $F_{ST}$ . The value obtained is likely to be a better approximation of the neutral  $F_{ST}$  (3). The approach is expected to be robust with respect to variation in mutation rate among loci, sample size, and departure from mutation/drift equilibrium (3), but see (5). In any case, we tested for selection on

a reduced dataset (microsatellites or SNPs) that included only the African and Asian populations so as to limit as much as possible departures from the assumptions of the test.

**Statistical, Population Genetic, and Phylogenetic Data Analyses.** Statistical calculations were performed with the R software (6), unless stated otherwise.

**Population and individual-based genetic trees.** We constructed Neighbor-joining trees (from microsatellite and SNP data) to examine the relationships between South American populations and those from the rest of the world. The trees were constructed using Cavalli-Sforza and Edwards' chord distance (7) computed between each pair of populations. This distance is typically used to reconstruct trees from population data (e.g., ref.(8)). All analyses were run using the software R-package APE (9). Matrices of pairwise shared allelic distances computed between isolates were also used to analyze the genetic relationship between SNP haplotypes (10).

**Principal Component Analyses.** Principal Component Analyses (PCA) were used to gain additional insights on the genetic structure of the studied isolates. The PCA were performed on the matrix of binary allele profiles using the adegenet R-package (11). Missing genotypes were replaced by the mean of the allelic frequency observed over all populations.

**STRUCTURE analyses.** We used the Bayesian clustering method implemented in STRUCTURE v.2.1 (12) to identify population structure. We ran models allowing for admixture, with the number of clusters  $K$  ranging from 1 to the number of populations (24, 33 or 15, depending on the dataset). All simulations used 100,000 Markov-chain Monte Carlo (MCMC) generations in the burn-in phase and 100,000 generations in the data collection phase. Ten independent runs were performed for each specified  $K$  to verify convergence in the estimates of posterior probabilities. The optimal number of clusters was estimated using the method proposed in (13) .

**Approximate Bayesian Computations (ABC).** For the microsatellite dataset, we used the Approximate Bayesian Computation (ABC) method as implemented in the package "DIY ABC" (14) to trace the introduction history of *P. falciparum* in South America. Three scenarios were considered and tested against each other. They differed in the order of introduction events or the presence of an unsampled population (Fig. S13).

In the first scenario, populations in South America were independently introduced from Africa (“Independent Introduction Scenario”). In the second scenario (“Serial Introduction Scenario”), only one South American population originated from the African source population, while a second South American population originated from the first. The third scenario (“Unsampled Population Scenario”) assumed that the two introduced populations derived from an unsampled population that itself derived from the African source. In all scenarios considered, the divergence time of population 1 is constrained to be older than the divergence time of population 2.

We used a subset of the West African populations (S) as the source population. We chose these populations because the transatlantic slave trade was preying primarily on populations along the west coast of Africa (Fig. 1). We created one large pooled source population because the *P. falciparum* populations located along the African coast are genetically very little differentiated ( $F_{ST}=0.009$  for “MS” and  $F_{ST} = 0.01$  for MS+). For the introduced populations (Pop1 and Pop2), we successively took all possible pairs of South American populations (Camopi, Trois Sauts, Maripasoula, Colombia, Bolivia and Brazil) but excluded Venezuela and Peru, which displayed a clear pattern of recent admixture. We also created a “southern cluster” comprising the three French Guianan, Brazilian and Bolivian populations, and a “northern cluster” comprising the two Colombian populations.

Analyses were performed using the demographic parameter prior distributions described in Table S7. We used a generalized stepwise model to simulate mutation at the markers of interest (i.e. microsatellites). In order to determine which scenario was most likely, we simulated each scenario one million times, and estimated for each scenario several summary statistics (mean number of alleles, mean gene diversity,  $F_{ST}$  and shared allelic distance between pairs of populations). From these, we assessed the posterior probability of each scenario using a polychotomous weighted logistic regression. The posterior probabilities for divergence times were also retrieved.

## SI References

1. Razakandrainibe FG, et al. (2005) "Clonal" population structure of the malaria agent *Plasmodium falciparum* in high-infection regions. *Proc Natl Acad Sci USA* 102:17388-17393.
2. Anderson TJC, Su ZX, Bockarie M, Lagog M, Day KP (1999) Twelve microsatellite markers for characterization of *Plasmodium falciparum* from finger-prick blood samples. *Parasitology* 119:113-125.
3. Beaumont MA, Nichols RA (1996) Evaluation loci for the use in the genetic analysis of population structure. *Proc Roy Soc Lond B* 263:1619-1626.
4. Antao T, Lopes A, Lopes RJ, Beja-Pereira A, Luikart G. (2008) LOSITAN: a workbench to detect molecular adaptation based on a Fst-outlier method. *BMC Bioinformatics* 9:323.
5. Excoffier L, Hofer T, Foll M (2009) Detecting loci under selection in a hierarchically structured population. *Heredity* 103:285-298.
6. R Development Core Team (2009), *Computing*. R Foundation for Statistical Computing, Vienna, Austria.
7. Cavalli-Sforza LL, Edwards AW (1967) Phylogenetic analysis. Models and estimation procedures. *Am J Hum Genet* 19:233-257.
8. Bowcock AM, et al. (1994) High resolution of human evolutionary trees with polymorphic microsatellites. *Nature* 368:455-457.
9. Paradis E, Claude J, Strimmer K (2004) APE: Analyses of Phylogenetics and Evolution in R language. *Bioinformatics* 20:289-290.
10. Jin L, Chakraborty R (1993) Estimation of Genetic Distance and Coefficient of Gene Diversity from Single-Probe Multilocus DNA Fingerprinting Data. *Mol Biol Evol* 11:120-127.
11. Jombart T (2008) adegenet: a R package for the multivariate analysis of genetic markers. *Bioinformatics* 24:1403-1405.
12. Pritchard JK, Stephens M, Donnelly P (2000) Inference of population structure using multilocus genotype data. *Genetics* 155:945-959.
13. Evanno G, Regnaut S, Goudet J (2005) Detecting the number of clusters of individuals using the software STRUCTURE: a simulation study. *Molecular Ecology* 14:2611-2620.

14. Cornuet JM, et al. (2008) Inferring population history with DIY ABC: a user-friendly approach to approximate Bayesian computation. *Bioinformatics* 24:2713-2719.
15. Anderson TJC, et al. (2000) Microsatellite markers reveal a spectrum of population structures in the malaria parasite *Plasmodium falciparum*. *Molecular Biology and Evolution* 17:1467-1482.
16. Aubouy A, et al. (2007) Dramatically decreased therapeutic efficacy of chloroquine and sulfadoxine-pyrimethamine, but not mefloquine, in southern Benin. *Tropical Medicine & International Health* 12:886-894.
17. Bogreau H, et al. (2006) Genetic diversity and structure of African *Plasmodium falciparum* populations in urban and rural areas. *Am J Trop Med Hyg* 74:953-959.
18. Andriantsoanirina V, et al. (2009) *Plasmodium falciparum* drug resistance in Madagascar: facing the spread of unusual pfdhfr and pfmdr-1 haplotypes and the decrease of dihydroartemisinin susceptibility. *Antimicrob Agents Chemother* 53:4588-4597.
19. Pumpaibool T, et al. (2009) Genetic diversity and population structure of *Plasmodium falciparum* in Thailand, a low transmission country. *Malaria Journal* 8:96.
20. Nair S, et al. (2003) A selective sweep driven by pyrimethamine treatment in southeast Asian malaria parasites. *Molecular Biology and Evolution* 20:1526-1536.
21. Legrand E, Volney B, Meynard JB, Mercereau-Puijalon O, Esterre P (2008) In vitro monitoring of *Plasmodium falciparum* drug resistance in French Guiana: a synopsis of continuous assessment from 1994 to 2005. *Antimicrobial Agents and Chemotherapy* 52:288-298.
22. Restrepo E, Carmona-Fonseca J, Maestre A. (2008) *Plasmodium falciparum*: high frequency of pfcrt point mutations and emergence of new mutant haplotypes in Colombia. *Biomedica* 28:523-530.
23. Grande T, et al. (2007) A Randomised Controlled Trial to Assess the Efficacy of Dihydroartemisinin-Piperaquine for the Treatment of Uncomplicated Falciparum Malaria in Peru. *Plos One* 2(10):e1101.
24. Weir BS, Cockerham CC (1984) Estimating F-statistics for the analysis of population structure. *Evolution* 38:1358-1370.

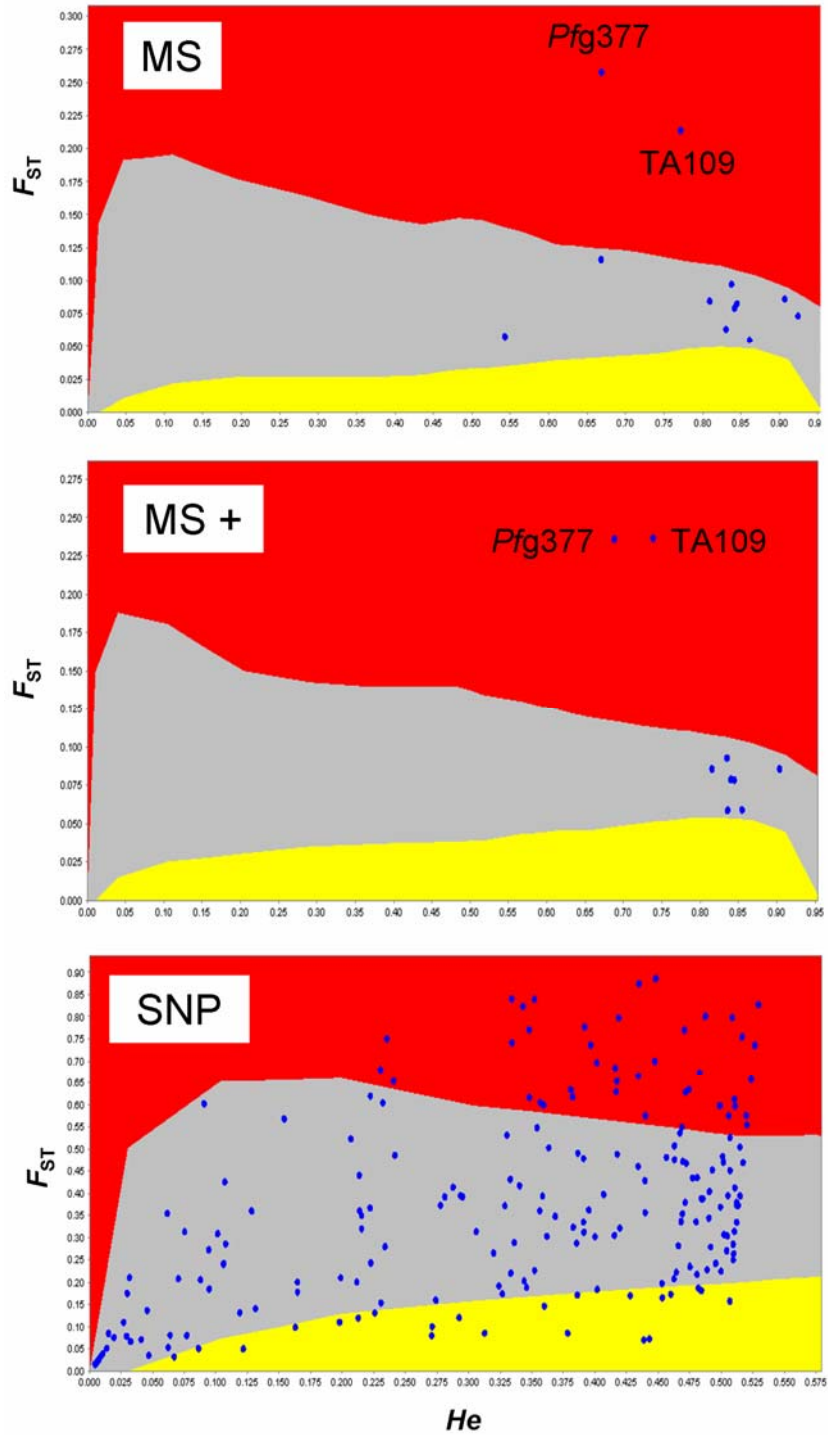

**Fig. S1.**  $F_{ST}$  values plotted against heterozygosity ( $He$ ) and computed using **a**, the MS dataset; **b**, the MS+ dataset; and **c**, the “SNP” dataset (see Materials and Methods and Table S1 for details). For MS and MS+, the microsatellite markers suspected to be under selection (*Pfg377* and TA109) are displayed. Grey: area including 95% of the neutral  $F_{ST}$  computed using an island model. Red: area including the highest 5% neutral  $F_{ST}$ . Yellow: area including the lowest 5% neutral  $F_{ST}$ . Detailed information is given in Tables S2 (microsatellites) and S3 (SNPs).

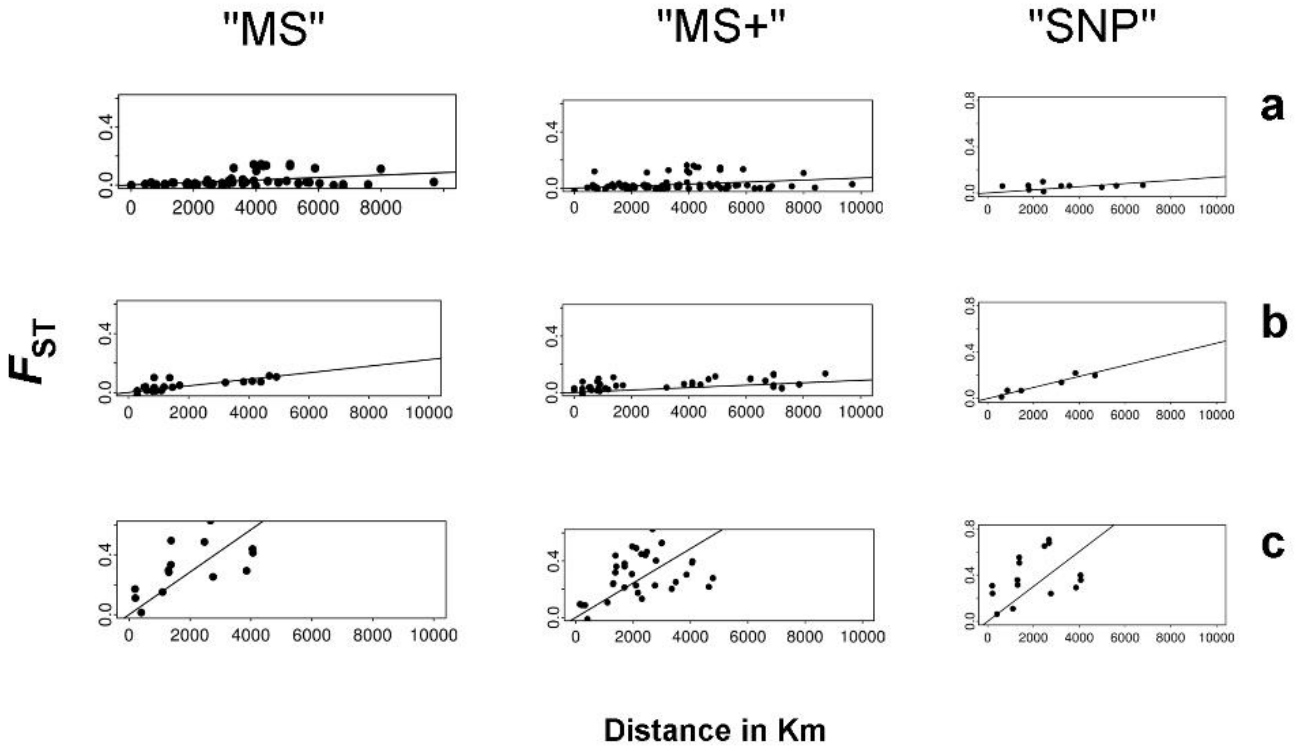

**Fig. S2.** Isolation by distance (IBD) within each continent. Pairwise geographic distances along landmasses plotted against pairwise genetic differentiation ( $F_{ST}$ ) computed for each dataset: MS, MS+ and SNPs. Loci suspected to be under selection were removed. **a**, African populations; **b**, Asian Populations; **c**, South American populations. All Mantel tests gave  $P$ -values  $<0.05$  except for Africa (all datasets) and South America (SNP dataset).



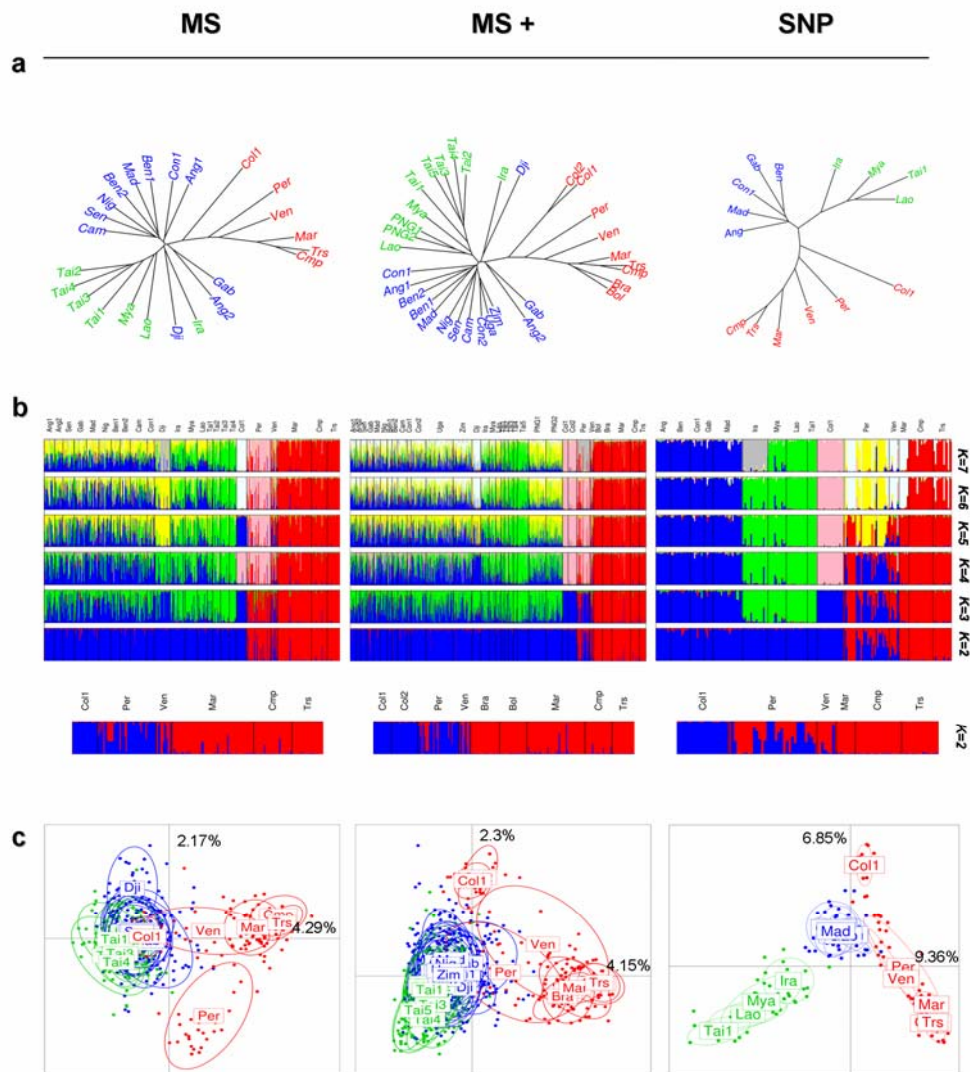

**Fig. S3.** Genetic relationship between South American populations and those from Africa and Asia, based on the microsatellite (MS and MS +) and SNP datasets. In all datasets, loci under selection were removed. **a.** Neighbor-joining trees of populations. **b.** Worldwide and South American population structure inferred by Bayesian clustering. Each isolate is shown as a thin vertical line partitioned into  $K$  colored components representing inferred membership in  $K$  genetic clusters.  $K$  varies from 2 to 7 for the worldwide analysis (upper graph). Bottom row provides the inferred population structure in South America for  $K = 2$ . **c.** First and second principal components of the Principal Component Analysis (PCA). Dots represent isolates. Ellipses represent 95% of the genetic variation within populations. Percentages of inertia are displayed directly along the respective axes (first axis: horizontal; second axis: vertical). The code name of each population is at the centroid of the ellipse. For trees and PCA: blue, African populations; green, Asian populations; red, South American populations. Ang1 and Ang2 : Angola, Ben1 and Ben2: Benin, Bra: Brazil, Bol: Bolivia, Cam: Cameroon, Cmp: Camopi (French Guiana), Col1 and Col2: Colombia, Con1: Republic of the Congo, Con2: Democratic Republic of the Congo, Dji: Djibouti, Gab: Gabon, Ira: Iran, Lao: Laos, Mad: Madagascar, Mar: Maripassoula (French Guiana), Mya: Myanmar, Nig: Niger, Per: Peru, PNG1 and PNG2: Papua New Guinea, Sen: Senegal, Tai1-Tai5: Thailand, Trs: Trois Sauts (French Guiana), Uga: Uganda, Ven: Venezuela, Zim: Zimbabwe. Details about the sampled populations are reported in Table S1.

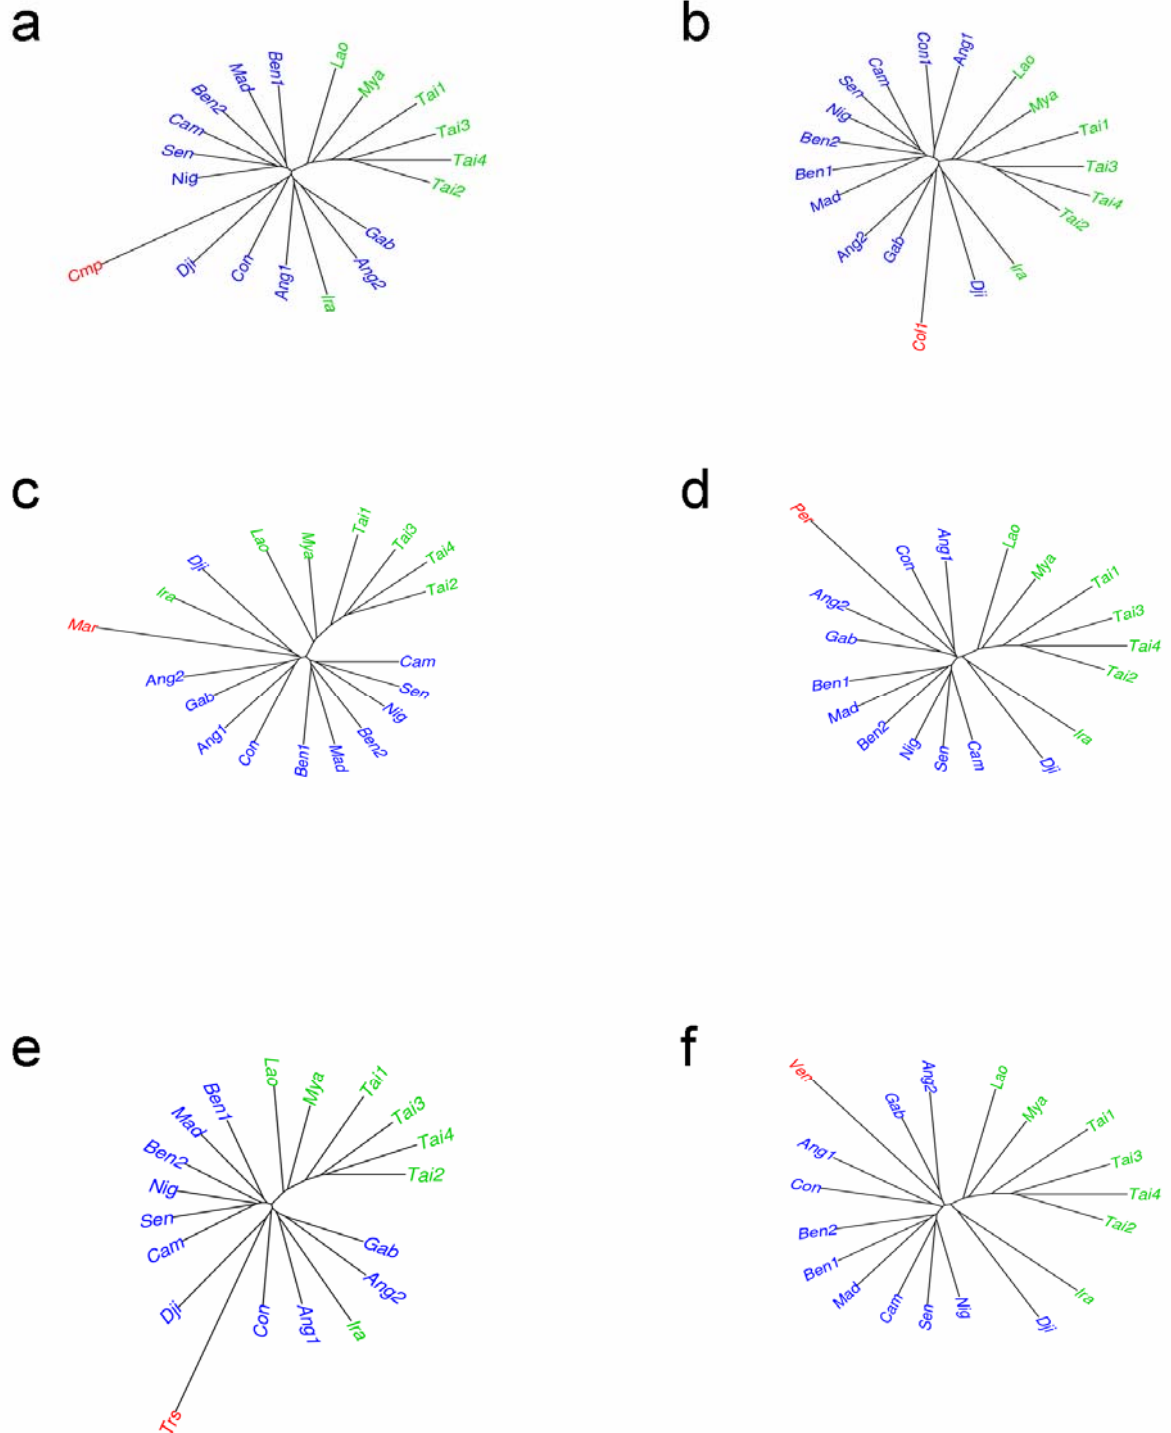

**Fig. S4.** Neighbor-joining trees of populations obtained by including the South American populations one by one (MS dataset excluding loci suspected to be under selection). **a**, Camopi (Cmp: French Guiana). **b**, Colombia (Col1). **c**, Maripasoula (Mar: French Guiana). **d**, Peru (Per). **e**, Trois Sauts (Trs: French Guiana). **f**, Venezuela (Ven). Blue: African populations; Green: Asian Populations, Red: South American populations. All other abbreviations as in Table S1.

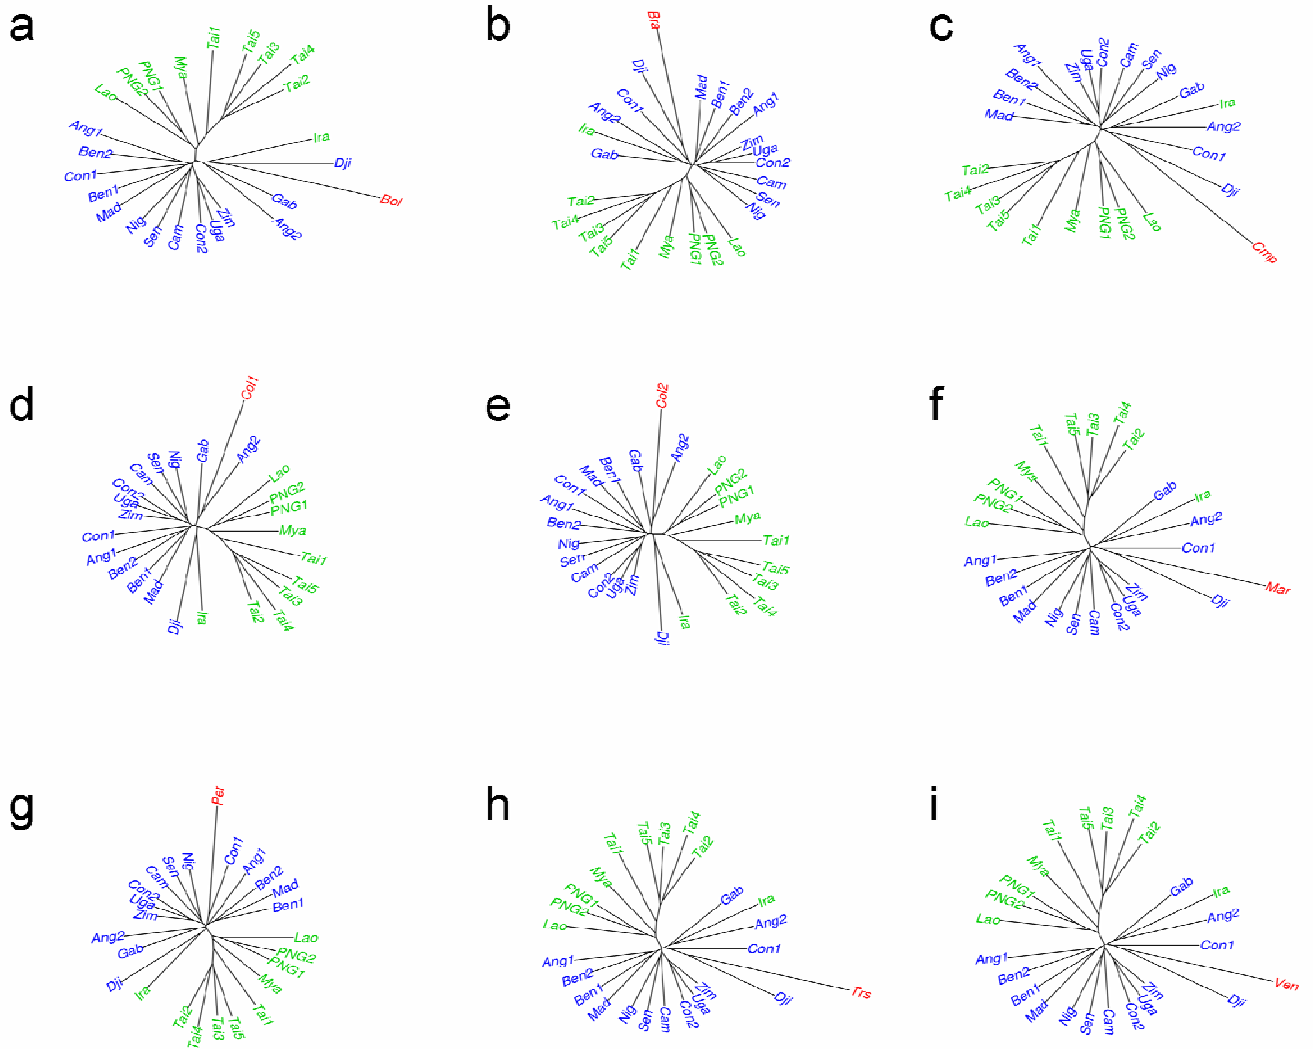

**Fig. S5.** Neighbor-joining trees of populations obtained by including the South American populations one by one (MS+ dataset including the data from ref. 1 and excluding the loci suspected to be under selection). **a**, Bolivia (Bol). **b**, Brazil (Bra). **c**, Camopi (Cmp: French Guiana). **d**, Colombia 1 (Col1). **e**, Colombia (Col2). **f**, Maripasoula (Mar: French Guiana). **g**, Peru (Per). **h**, Trois Sauts (Trs: French Guiana). **i**, Venezuela (Ven). Blue: African populations; Green: Asian Populations, Red: South American populations. All other abbreviations as in Table S1.

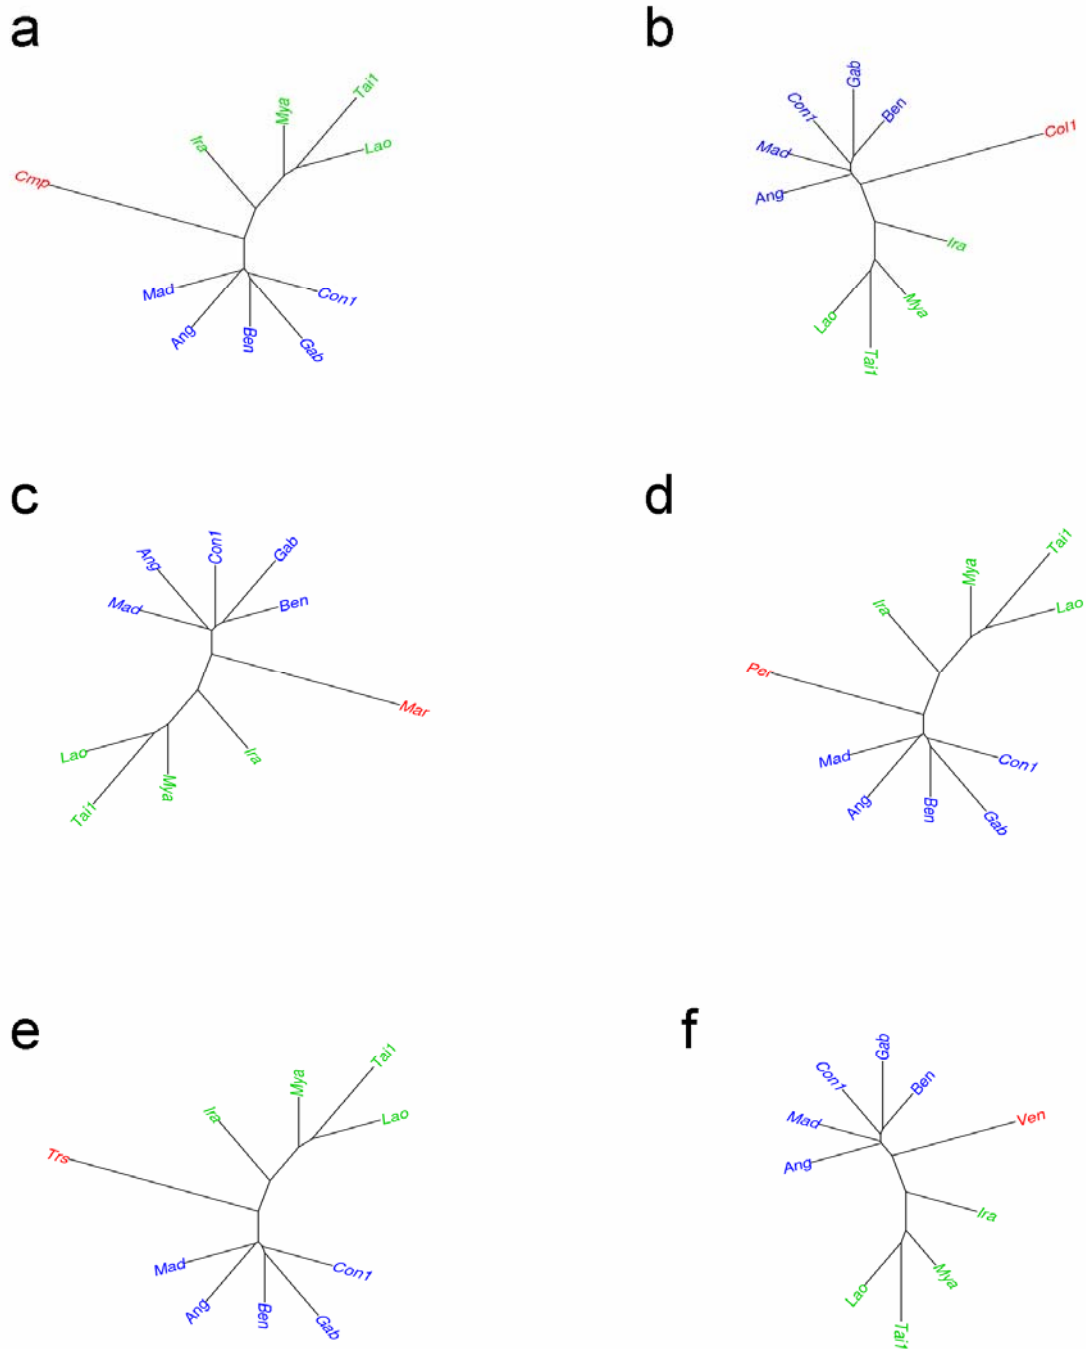

**Fig. S6.** Neighbor-joining trees of populations obtained by including the South American populations one by one (SNP dataset excluding loci suspected to be under selection). **a**, Camopi (Cmp: French Guiana). **b**, Colombia (Col1). **c**, Maripasoula (Mar: French Guiana). **d**, Peru (Per). **e**, Trois Sauts (Trs: French Guiana). **f**, Venezuela (Ven). Blue: African populations; Green: Asian Populations, Red: South American populations. All other abbreviations as in Table S1.

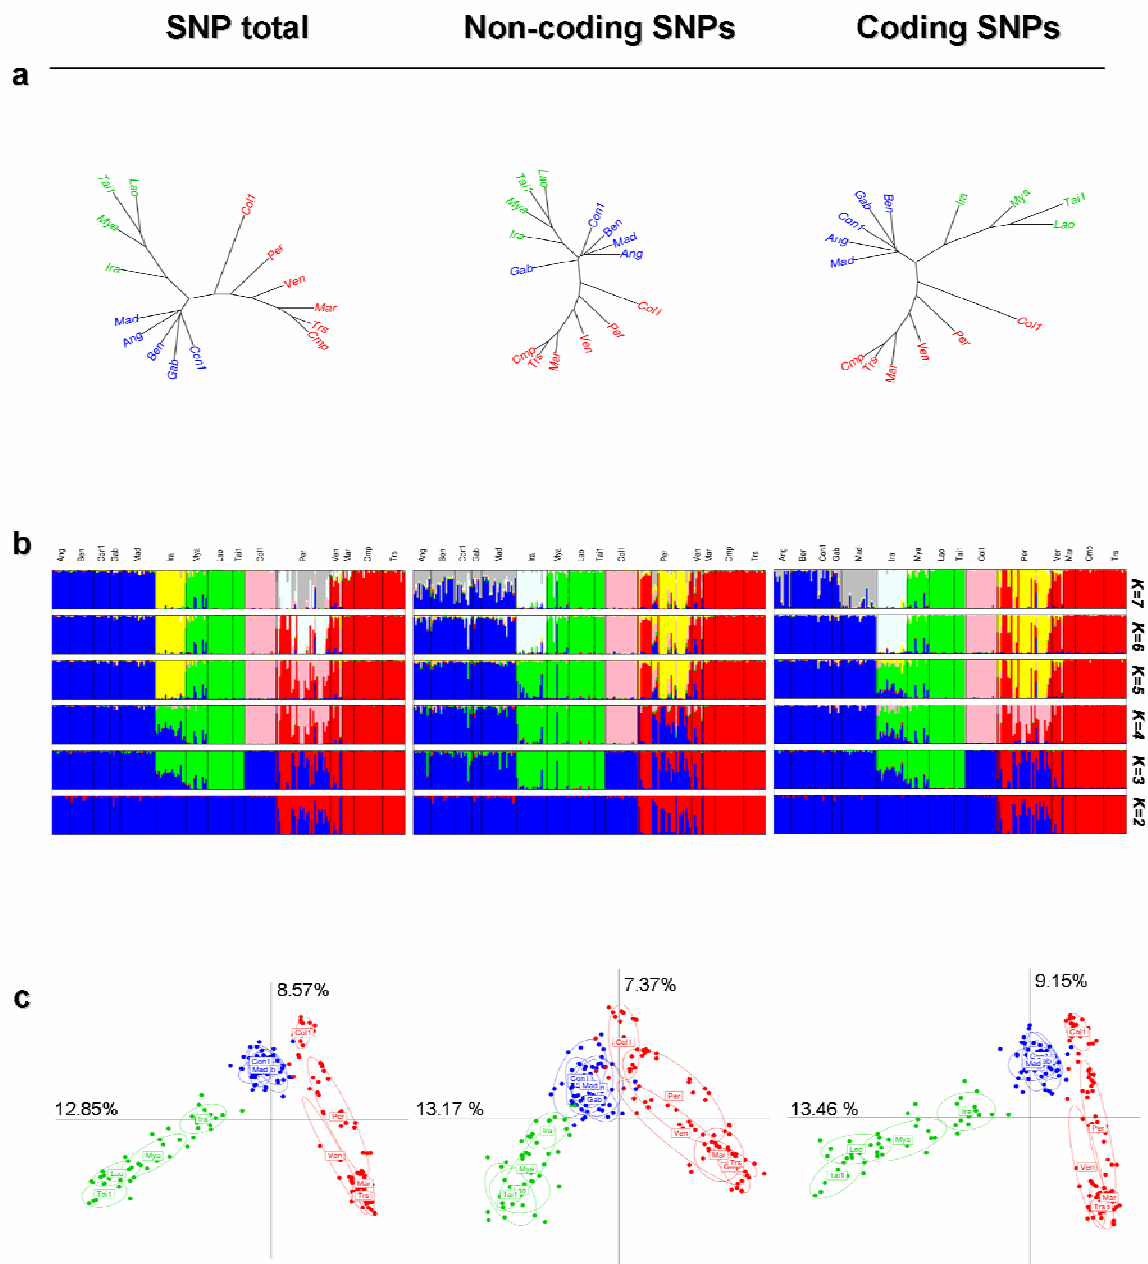

**Fig. S7.** Genetic relationship between South American populations vs. Africa and Asia based on all SNPs (SNP total), only non-coding SNPs, or only coding-SNPs. All loci are herein considered, even those suspected to be under selection. **a**, Neighbor-joining trees of populations. **b**, Population structure inferred by Bayesian clustering. Each individual is shown as a thin vertical line partitioned into  $K$  colored components representing inferred membership in  $K$  genetic clusters ( $K$  varying from 2 to 7). **c**, Projection of the Principal Component Analysis (PCA) on axes 1 (horizontal) and 2 (vertical). Dots represent individuals. Ellipses are approximate 95% confidence limits for populations. The name of each population is located at the centroid of the ellipse. Percentages of inertia are displayed directly along the respective axes (first axis: horizontal; second axis: vertical). For trees and PCA, Blue: African populations; Green: Asian Populations, Red: South American populations. For abbreviations, please refer to Table S1.

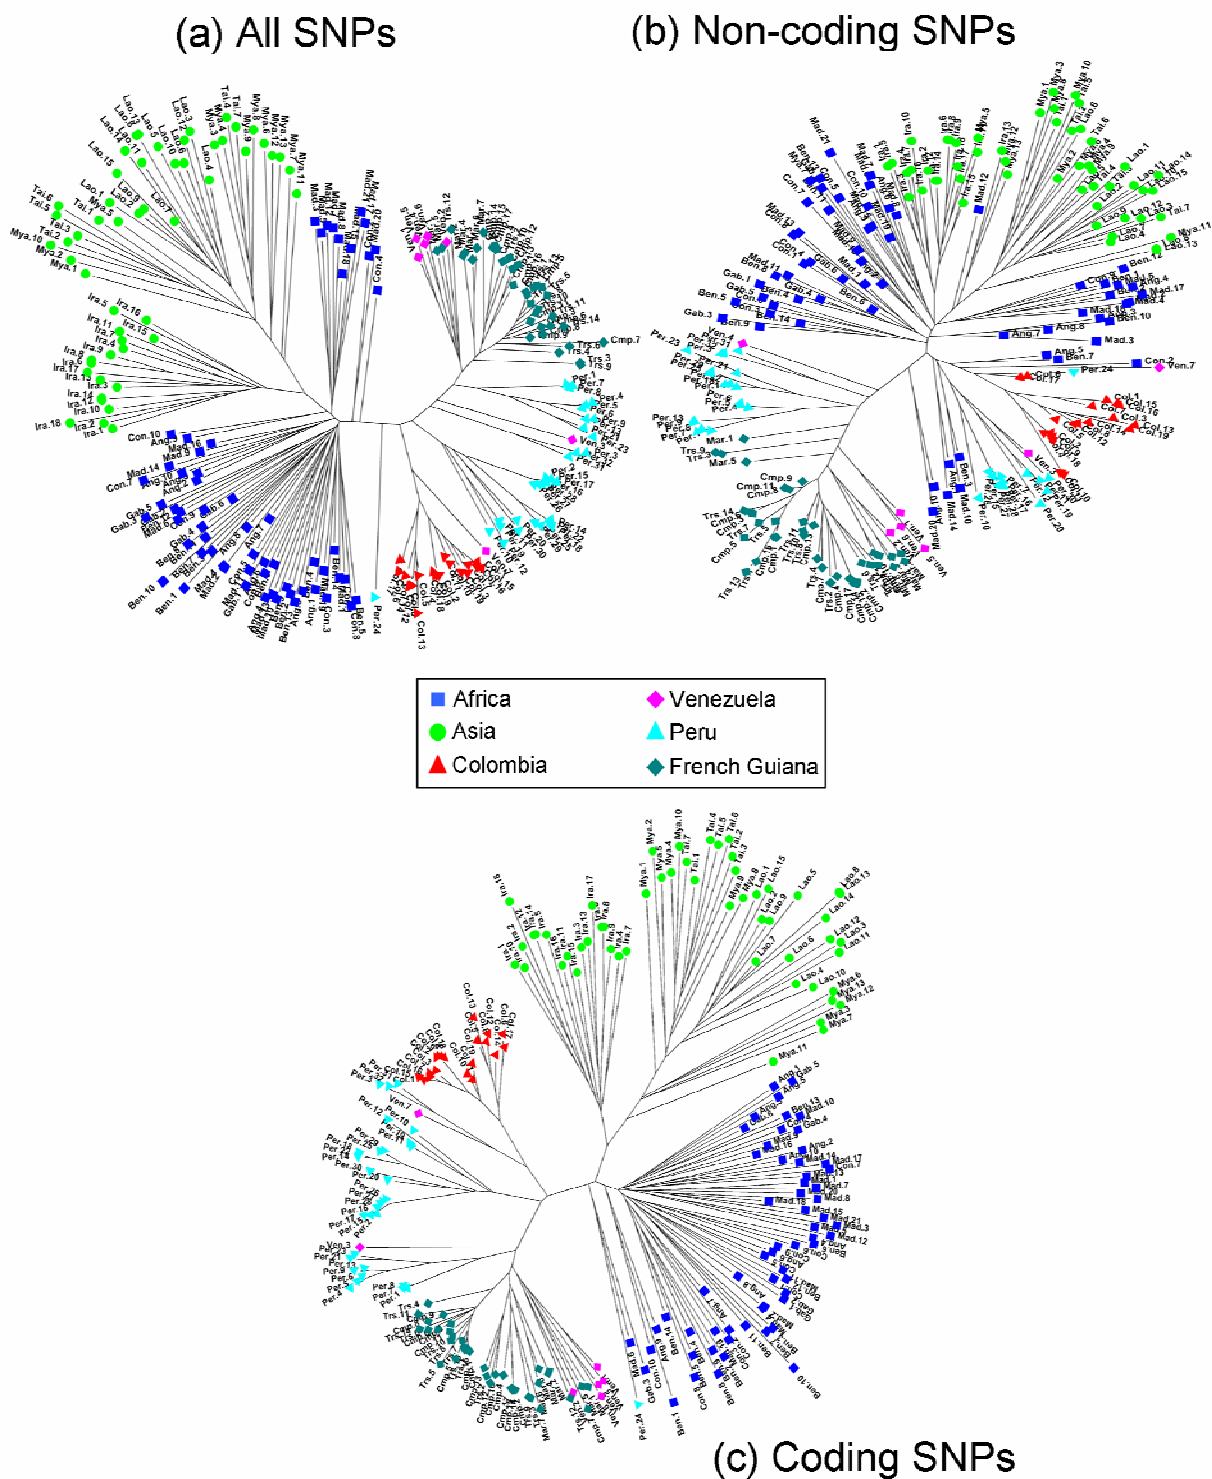

**Fig. S8.** Neighbor-joining trees of individuals, using all SNPs (a); only non-coding SNPs (b); or only coding SNPs (c). All loci are considered, including those suspected to be under selection.

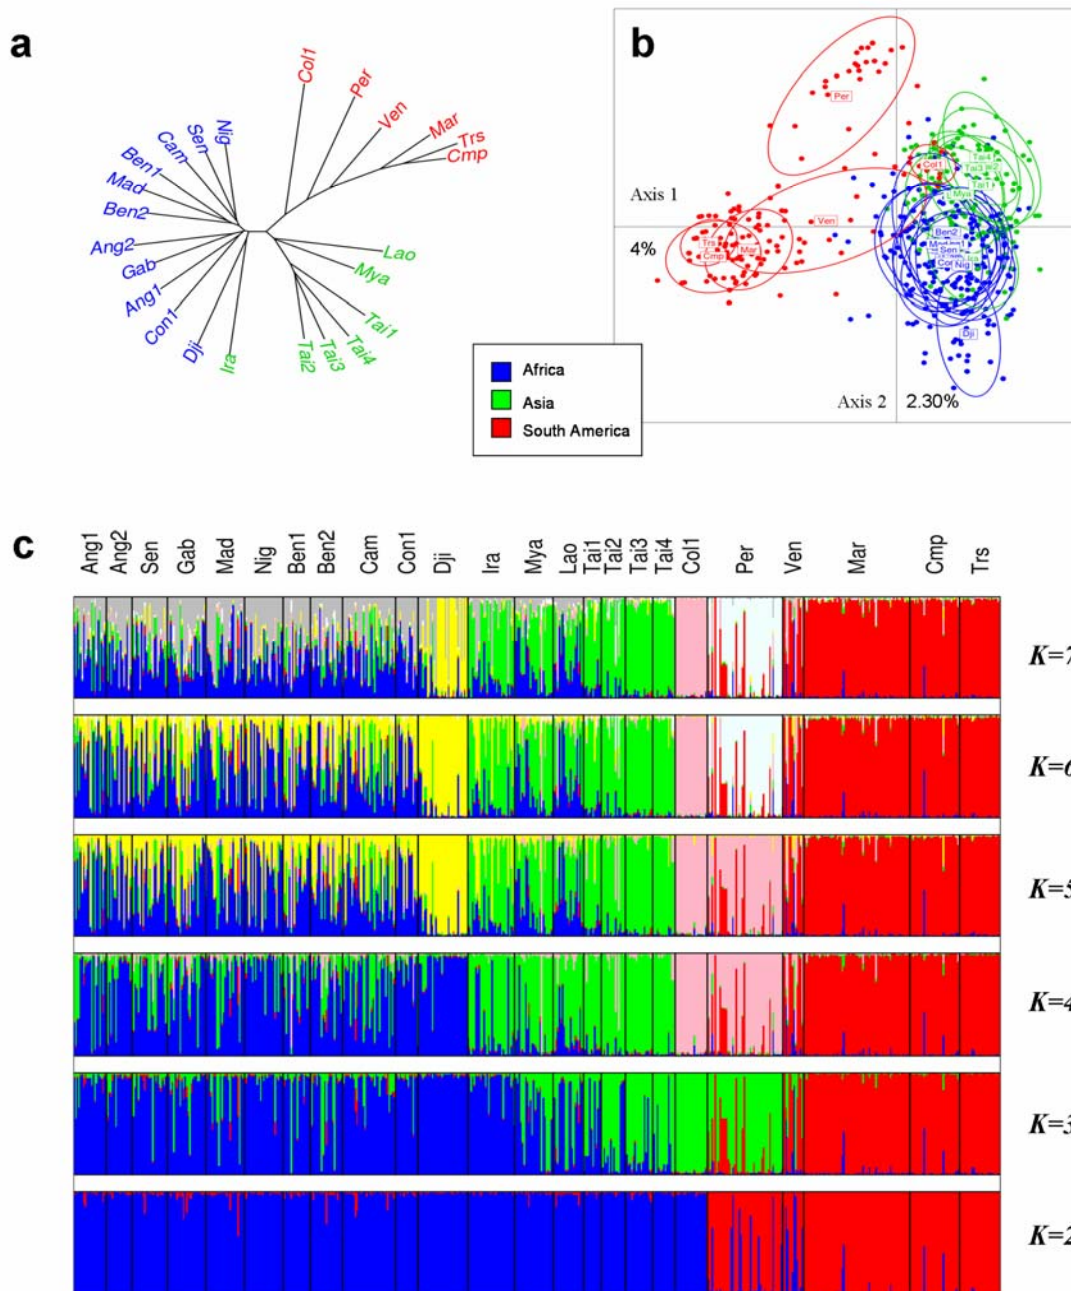

**Fig. S9.** Genetic relationship between South American populations vs. African and Asian populations, based on all microsatellite markers (MS dataset), including loci suspected of being under selection. **a**, Neighbor-joining trees of populations. **b**, Projection of the Principal Component Analysis (PCA) on axes 1 and 2. Dots represent individuals. Ellipses are approximate 95% confidence limits for populations. The name of each population is located at the centroid of the ellipse. Percentages of inertia are displayed directly along the respective axes (first axis: horizontal; second axis: vertical). **c**, Population structure inferred by Bayesian clustering. Each individual is shown as a thin vertical line partitioned into  $K$  colored components representing inferred membership in  $K$  genetic clusters ( $K$  varying from 2 to 7). For trees and PCA, Blue: African populations; Green: Asian Populations, Red: South American populations. For abbreviations, please refer to Table S1.

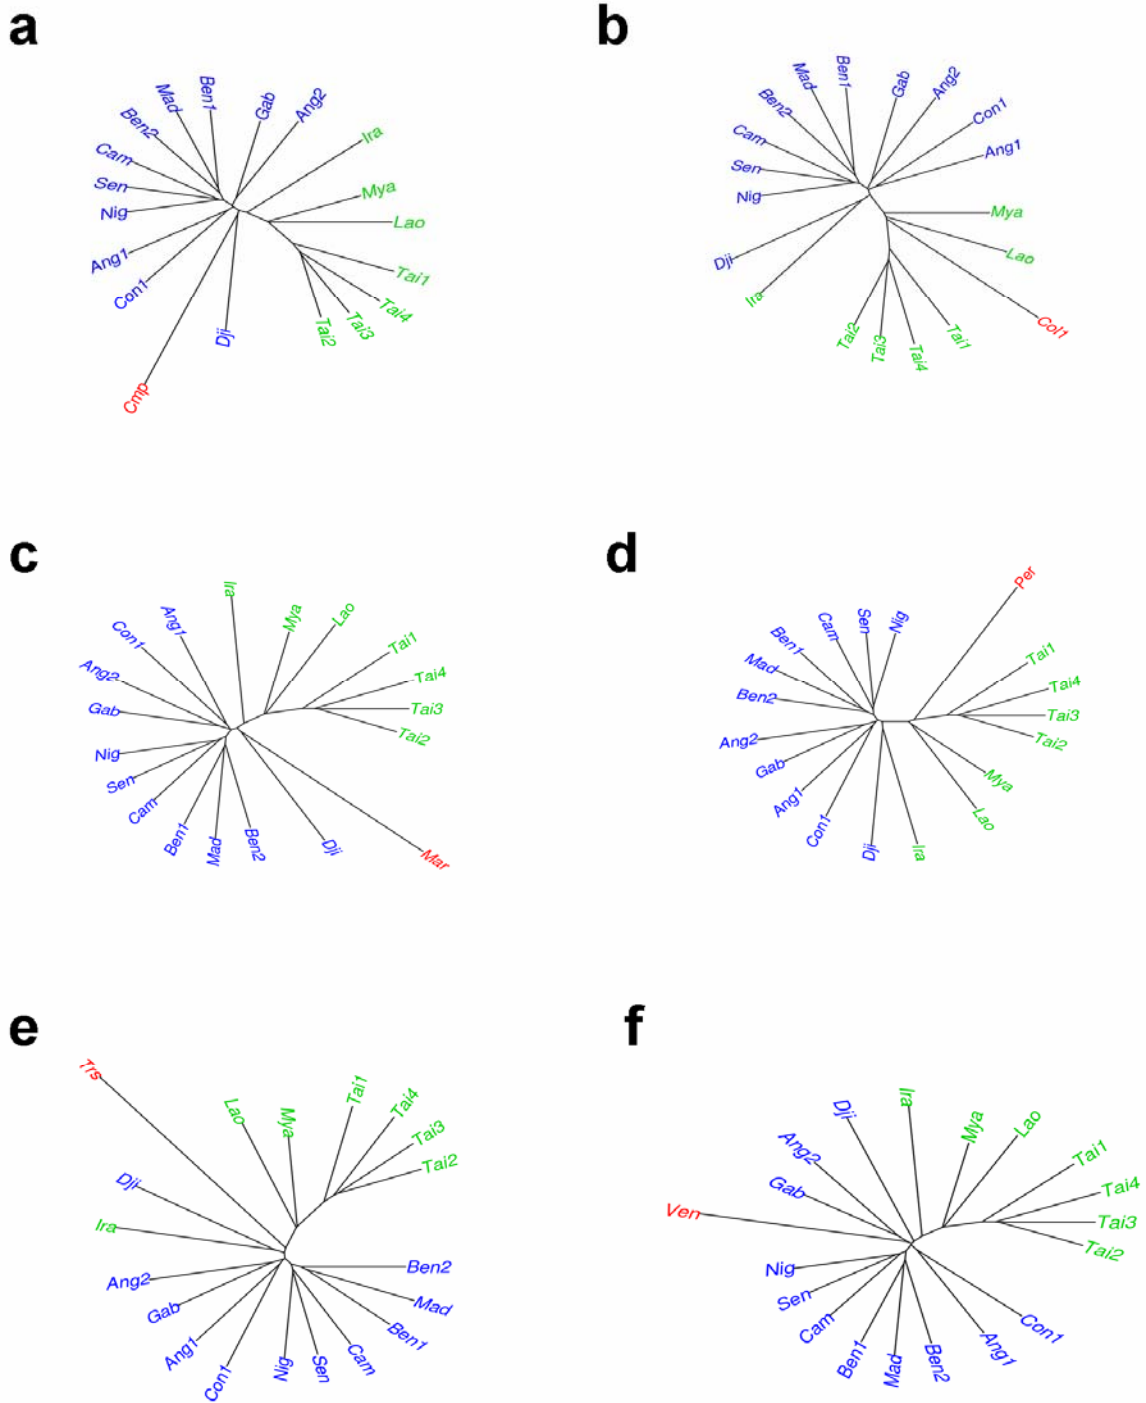

**Fig. S10.** Neighbor-joining trees of populations obtained by adding the South American populations one by one for the MS dataset including all loci even those suspected of being under selection. **a**, Camopi (Cmp: French Guiana). **b**, Colombia (Col1). **c**, Maripasoula (Mar: French Guiana). **d**, Peru (Per). **e**, Trois Sauts (Trs: French Guiana). **f**, Venezuela (Ven). Blue: African populations; Green: Asian Populations, Red: South American populations. All other abbreviations as in Table S1.



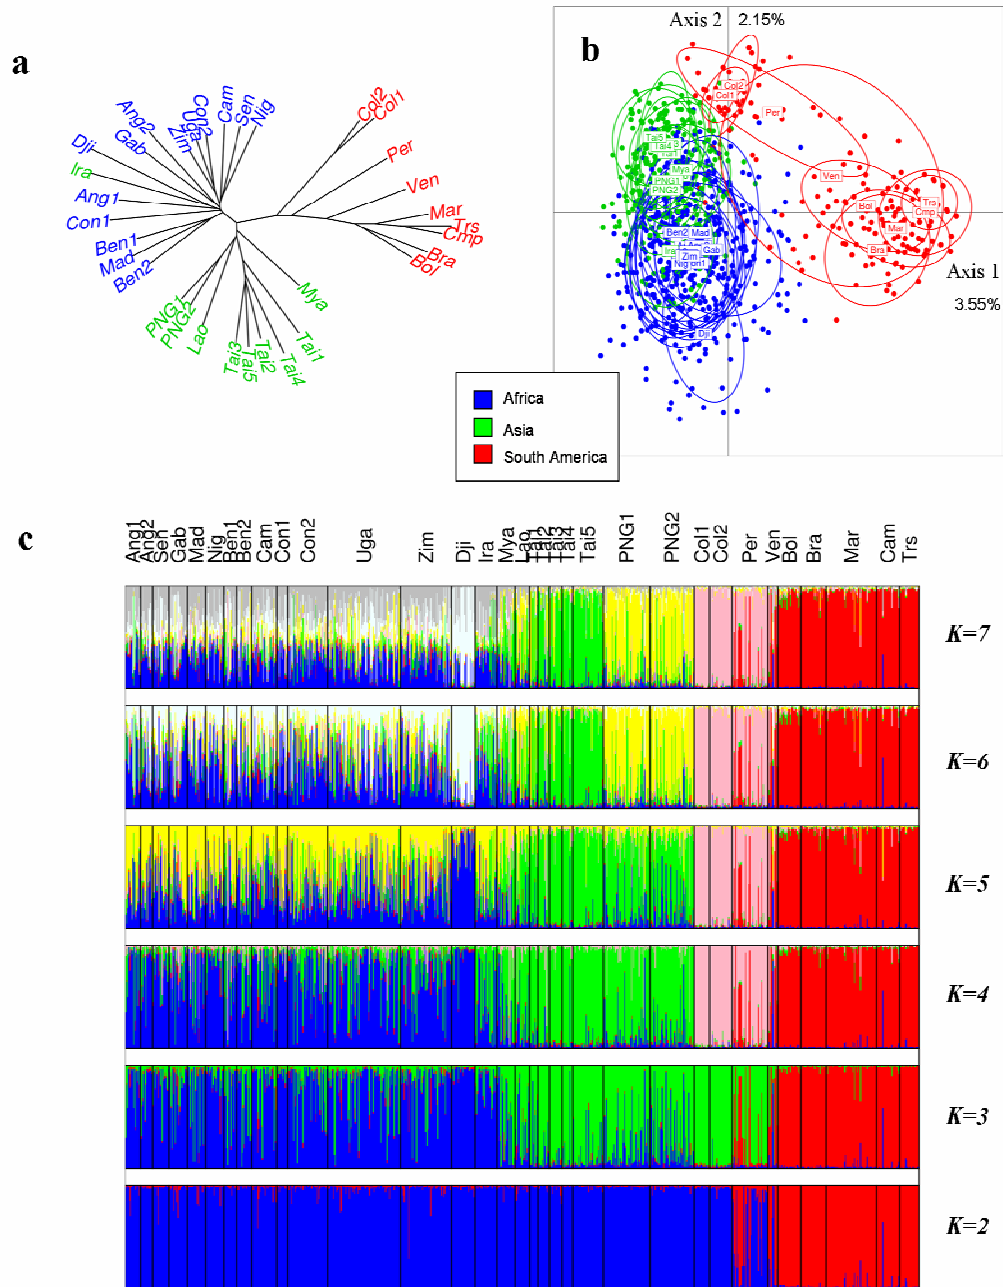

**Fig. S11.** Genetic relationship between South American populations vs. African and Asian populations using the MS + dataset including the data from (1) and considering all loci even those suspected to be under selection. **a**, Neighbor-joining trees of population relationships. **b**, Projection of the Principal Component Analysis (PCA) on axis 1 and 2. Dots represent individuals. Ellipses are approximate 90% confidence limits for populations. The name of each population is located at the barycentre of the ellipse. Percentages of inertia are displayed directly along the respective axes (first axis: horizontal; second axis: vertical). **c**, Population structure inferred by Bayesian clustering. Each individual is shown as a thin vertical line partitioned into  $K$  colored components representing inferred membership in  $K$  genetic clusters ( $K$  varying from 2 to 7). For trees and PCA, Blue: African populations; Green: Asian Populations, Red: South American populations. All other abbreviations as in Table S1.

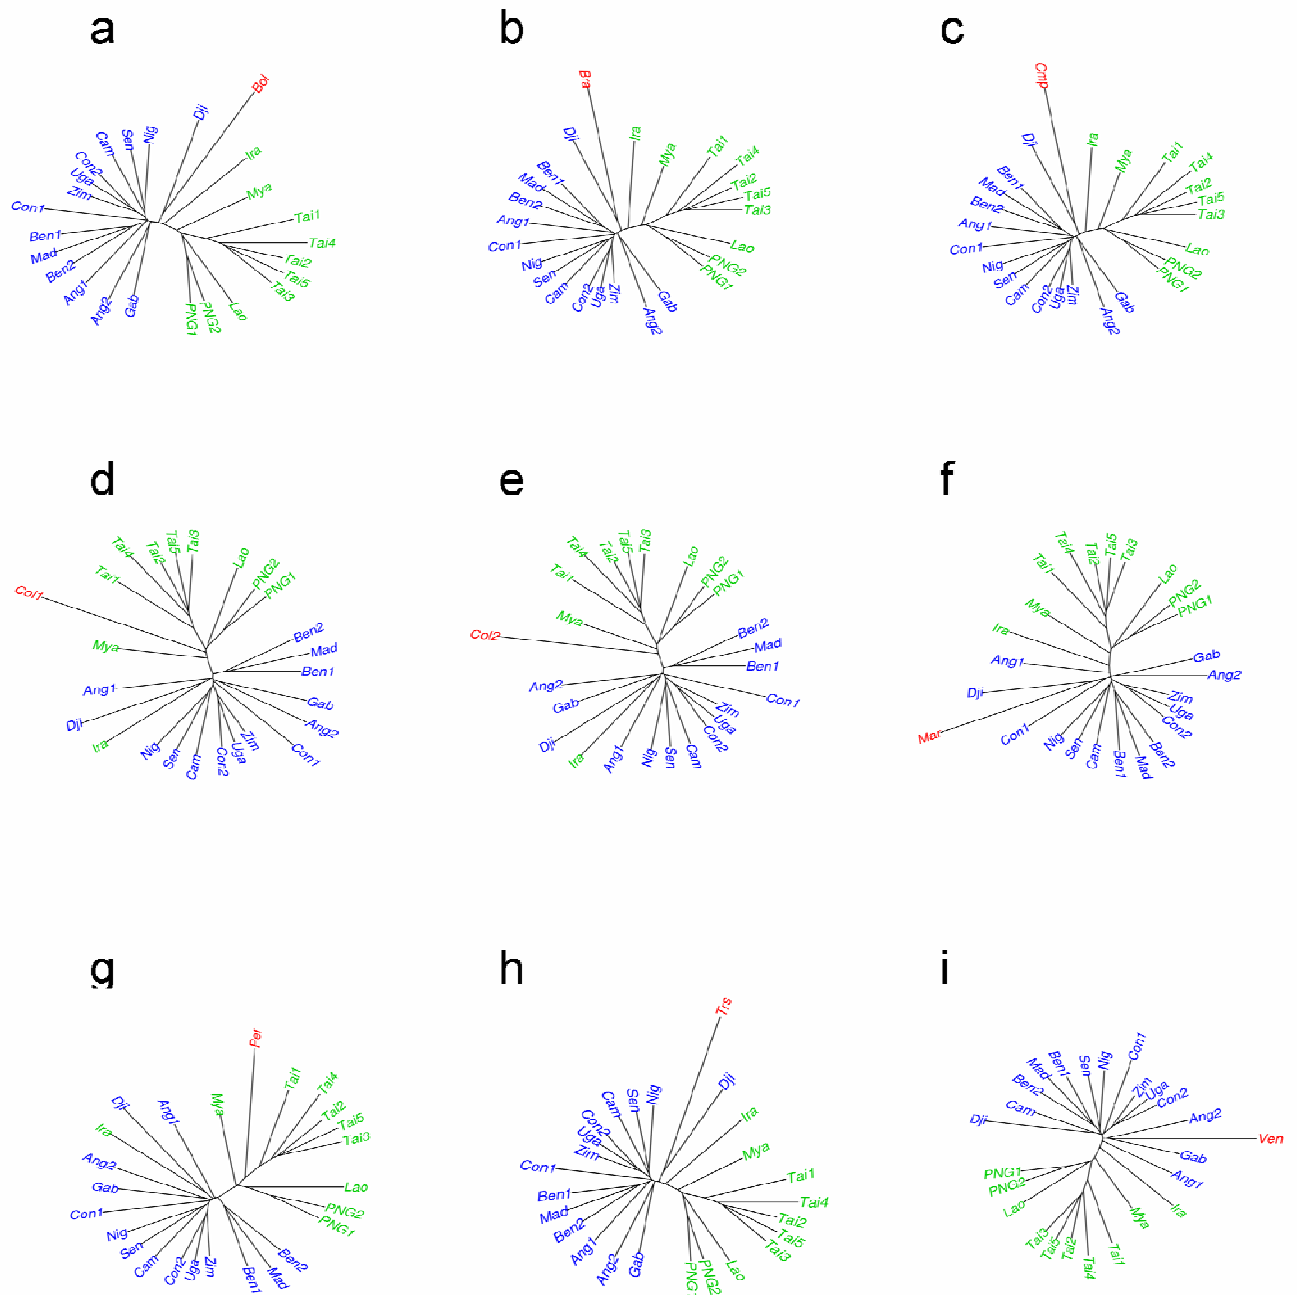

**Fig. S12.** Neighbor-joining trees of population relationships obtained by adding the South American populations one by one, using the MS+ dataset including the data from (1) and considering all loci even those suspected to be under selection. **a**, Bolivia (Bol). **b**, Brazil (Bra). **c**, Camopi (Cmp: French Guiana). **d**, Colombia 1 (Col). **e**, Colombia 2 (Col2). **f**, Maripasoula (Mar: French Guiana). **g**, Peru (Per). **h**, Trois Sauts (Trs: French Guiana). **i**, Venezuela (Ven). Blue: African populations; Green: Asian Populations, Red: South American populations. All other abbreviations as in Table S1.

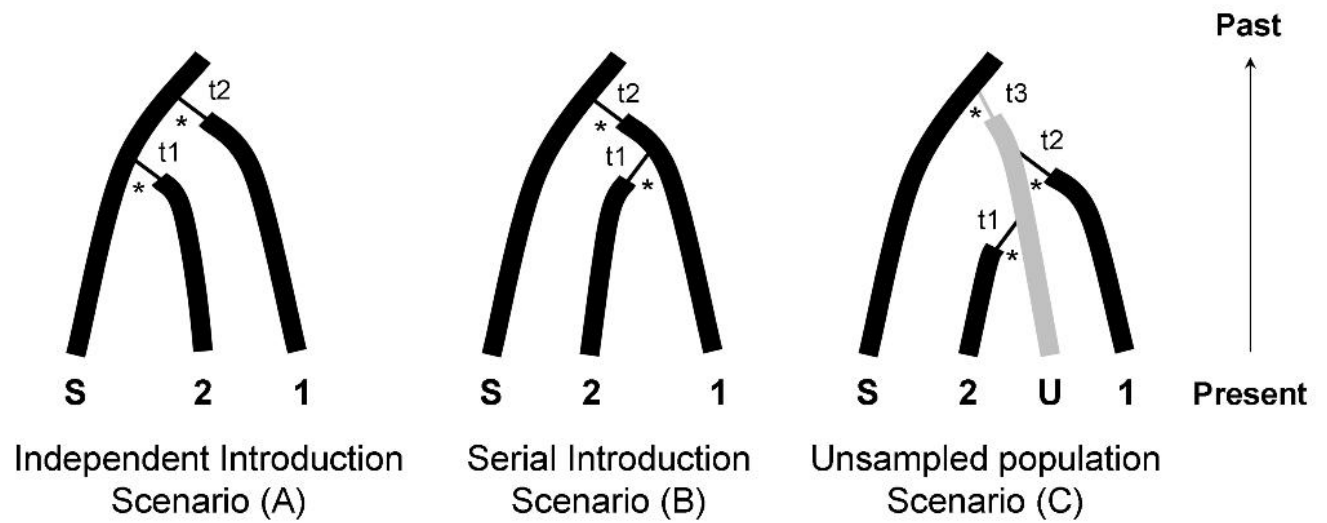

**Fig. S13.** Three scenarios tested in the ABC analysis. Table S7 gives the prior distribution for each of the demographic parameters included in the analysis. S: Source: 1: Population 1: 2: Population 2: U: Unsampered population:  $t_3$ ,  $t_2$ ,  $t_1$ : Divergence times. \*: period of bottleneck.

**Table S1.** Characteristics of the *Plasmodium falciparum* samples with geographical coordinates, total sample size, and number of mono-infected isolates. The abbreviations shown here are those used in the figures. \*, populations with multi-infected samples removed before our study. #, populations from (15) included in the MS+ dataset. §, from populations included in the SNP dataset. For mono-infected samples, the number between parentheses indicates the number of isolates genotyped at 272 SNPs. All isolates, except for the populations from (15) were genotyped by us.

| Country                          | Site                                    | Short Name        | Latitude      | Longitude      | Sample size | Mono-infected sample size | Years of collection | Reference     |
|----------------------------------|-----------------------------------------|-------------------|---------------|----------------|-------------|---------------------------|---------------------|---------------|
| <b>AFRICA</b>                    |                                         |                   |               |                |             |                           |                     |               |
| Angola                           | Chisseque                               | Ang1 <sup>§</sup> | 12° 42' 00" S | 14° 10' 00" E  | 47          | 20 (2)                    | 2008                | Present study |
|                                  | Libata                                  | Ang2 <sup>§</sup> | 15° 39' 58" S | 17° 26' 29" E  | 61          | 16 (8)                    | 2008                | Present study |
| Benin                            | Kpasse (Ouidah)                         | Ben1 <sup>§</sup> | 06° 22' 00" N | 02° 05' 00" E  | 42          | 17 (4)                    | 2005                | (16)          |
|                                  | Topka Dome (Ouidah)                     | Ben2 <sup>§</sup> | 06° 30' 00" N | 02° 00' 05" E  | 53          | 20 (10)                   | 2005                | (16)          |
| Cameroon                         | Simbock/Tibati                          | Cam               | 05° 15' 20" N | 11° 41' 55" E  | 33*         | 33                        | 2003                | Present study |
| Republic of the Congo            | Brazzaville, Gamboma, Pointe Noire, Oyo | Con1 <sup>§</sup> | 00° 13' 44" S | 15° 49' 45" E  | 85          | 14 (10)                   | 2005                | Present study |
| Djibouti                         | Djibouti City                           | Dji               | 11° 35' 00" N | 43° 08' 00" E  | 43          | 31                        | 2002                | (17)          |
| Gabon                            | Near Kango                              | Gab <sup>§</sup>  | 00° 08' 49" N | 10° 04' 50" E  | 49          | 24 (6)                    | 2008                | Present study |
| Madagascar                       | All over the country                    | Mad <sup>§</sup>  | 18° 54' 53" S | 47° 31' 54" E  | 60          | 24 (21)                   | 2006-2007           | (18)          |
| Niger                            | Niamey                                  | Nig               | 13° 30' 45" N | 02° 06' 45" E  | 38          | 24                        | 2001                | (17)          |
| Senegal                          | Dakar                                   | Sen               | 14° 45' 00" N | 17° 20' 00" W  | 40          | 22                        | 2002                | (17)          |
| Democratic Republic of the Congo | Kimpese                                 | Con2 <sup>#</sup> | 05° 33' 46" S | 14° 26' 06" E  | NA          | 53                        | 1993                | (15)          |
| Uganda                           | Entebbe                                 | Uga <sup>#</sup>  | 00° 03' 10" N | 32° 27' 54" E  | NA          | 96                        | 1996-1997           | (15)          |
| Zimbabwe                         | Mutare/Mutasa                           | Zim <sup>#</sup>  | 18° 58' 56" S | 32° 40' 14" E  | NA          | 67                        | 1998                | (15)          |
| <b>ASIA</b>                      |                                         |                   |               |                |             |                           |                     |               |
| Iran                             | Sistan-Baluchistan                      | Ira <sup>§</sup>  | 26° 37' 60" N | 61° 16' 32" E  | 50          | 29 (18)                   | 2000-2003           | Present study |
| Thailand                         | Maehongsorn                             | Tai1 <sup>§</sup> | 19° 51' 25" N | 97° 57' 60" E  | 11*         | 11 (7)                    | 2005                | (19)          |
|                                  | Tak                                     | Tai2              | 16° 54' 07" N | 99° 00' 46" E  | 15*         | 15                        | 2007                | (19)          |
|                                  | Kanchanaburi                            | Tai3              | 14° 41' 07" N | 99° 01' 56" E  | 17*         | 17                        | 2006                | (19)          |
|                                  | Ranong                                  | Tai4              | 10° 00' 41" N | 98° 41' 57" E  | 14*         | 14                        | 2006                | (19)          |
|                                  | Tak (Shoklo region)                     | Tai5 <sup>#</sup> | 16° 54' 07" N | 99° 00' 46" E  | NA          | 40                        | 1997-1998           | (15)          |
| Myanmar                          | Rakhine                                 | Mya <sup>§</sup>  | 19° 48' 36" N | 93° 59' 16" E  | 30          | 24 (13)                   | 2000                | (20)          |
| Laos                             | Sekong                                  | Lao <sup>§</sup>  | 15° 20' 21" N | 106° 43' 21" E | 30          | 19 (15)                   | 1999-2000           | (20)          |
| Papua New Guinea                 | Buksak                                  | PNG1 <sup>#</sup> | NA            | NA             | NA          | 62                        | 1997                | (15)          |
|                                  | Mebat                                   | PNG2 <sup>#</sup> | 05° 04' 40" S | 145° 46' 52" E | NA          | 58                        | 1997                | (15)          |

---

**SOUTH AMERICA**

---

|               |                                              |                   |               |               |     |         |           |               |
|---------------|----------------------------------------------|-------------------|---------------|---------------|-----|---------|-----------|---------------|
| French Guiana | Camopi                                       | Cmp <sup>§</sup>  | 03° 09' 49" N | 52° 20' 32" W | 59  | 31 (17) | 2006-2008 | Present study |
|               | Trois Sauts                                  | Trs <sup>§</sup>  | 02° 20' 44" N | 52° 42' 14" W | 49  | 26 (14) | 2006-2008 | Present study |
|               | Maripasoula                                  | Mar <sup>§</sup>  | 03° 37' 54" N | 54° 02' 10" W | 66* | 66 (7)  | 2002-2006 | (21)          |
| Colombia      | Turbo/Bajo Cauca                             | Col1 <sup>§</sup> | 08° 24' 53" N | 75° 53' 52" W | 25  | 20 (19) | 2002-2004 | (22)          |
|               | El Bagre (Bajo Cauca region)                 | Col2 <sup>#</sup> | 07° 33' 36" N | 74° 58' 01" W | NA  | 30      | 1998      | (15)          |
| Peru          | Province of Iquitos                          | Per <sup>§</sup>  | 03° 43' 54" N | 73° 16' 39" W | 70  | 47 (32) | 2003-2004 | (23)          |
| Venezuela     | Bolivar and Amazonas departments (provinces) | Ven <sup>§</sup>  | 06° 21' 44" N | 63° 34' 50" W | 15  | 13 (7)  | 2003-2007 | Present study |
| Bolivia       | Guayaramerin                                 | Bol <sup>#</sup>  | 10° 50' 44" S | 65° 23' 08" W | NA  | 31      | 1994      | (15)          |
| Brazil        | Porto Velho/Rondonia                         | Bra <sup>#</sup>  | 08° 45' 43" S | 63° 54' 07" W | NA  | 33      | 1997-1998 | (15)          |

---

**Table S2.** The 12 *P. falciparum* microsatellite loci with marker code, chromosome location, GenBank accession number, number of alleles detected per locus, and size range of the amplified alleles in base pairs. The primer sequences for each pair of PCR primers and PCR conditions are as in (19). \* Loci in common with the study by (15).

| <b>Microsatellite marker</b> | <b>Chromosome location</b> | <b>GenBank access no.</b> | <b>Number of alleles</b> | <b>Size range (Base pairs)</b> |
|------------------------------|----------------------------|---------------------------|--------------------------|--------------------------------|
| TA80                         | 10                         | G38857                    | 5                        | 142-154                        |
| ARP2                         | 13                         | G37793                    | 12                       | 150-192                        |
| TA1 *                        | 6                          | AF010507                  | 13                       | 159-195                        |
| Poly $\alpha$ *              | 4                          | L18785                    | 21                       | 131-194                        |
| TA60 *                       | 13                         | AF010556                  | 12                       | 66-91                          |
| ARA2 *                       | 11                         | X17484                    | 12                       | 56-89                          |
| Pfg377 *                     | 12                         | L04161                    | 7                        | 92-110                         |
| PfPK2 *                      | 12                         | X63648                    | 14                       | 163-208                        |
| TA87 *                       | 6                          | AF010571                  | 15                       | 82-122                         |
| TA109 *                      | 6                          | AF010508                  | 21                       | 144-210                        |
| TA81 *                       | 5                          | AF010510                  | 11                       | 108-138                        |
| CIM8                         | 1                          | G38013                    | 19                       | 156-210                        |

**Table S3.** Characteristics of the 272 Single Nucleotide Polymorphisms (SNPs) genotyped in *P. falciparum* isolates. <sup>a</sup>, “Yes” means that the mutation induced an amino acid change (non-synonymous SNP); “No” means that it does not, either because it is not located in a coding region or because the mutation corresponds to a synonymous polymorphism.

| SNP name  | Chromosome location | Chromosome position (bp) | Gene ID  | Coding Region | Non-synonymous SNP <sup>a</sup> |
|-----------|---------------------|--------------------------|----------|---------------|---------------------------------|
| MAL1.1303 | 1                   | 161748                   | PFA0110w | Yes           | No                              |
| MAL1.1698 | 1                   | 248536                   | Null     | No            | No                              |
| MAL1.1775 | 1                   | 269371                   | PFA0310c | Yes           | No                              |
| MAL1.2165 | 1                   | 375657                   | PFA0460c | Yes           | Yes                             |
| MAL1.2547 | 1                   | 454537                   | Null     | No            | No                              |
| MAL1.2718 | 1                   | 497763                   | PFA0625w | Yes           | No                              |
| MAL1.3532 | 1                   | 552009                   | Null     | No            | No                              |
| MAL2.1214 | 2                   | 69773                    | Null     | No            | No                              |
| MAL2.1464 | 2                   | 109248                   | Null     | No            | No                              |
| MAL2.1601 | 2                   | 133655                   | Null     | No            | No                              |
| MAL2.1674 | 2                   | 161537                   | Null     | No            | No                              |
| MAL2.1692 | 2                   | 165520                   | Null     | No            | No                              |
| MAL2.1769 | 2                   | 185349                   | PFB0190c | Yes           | yes                             |
| MAL2.1949 | 2                   | 233720                   | Null     | No            | No                              |
| MAL2.2488 | 2                   | 373912                   | PFB0405w | Yes           | Yes                             |
| MAL2.2514 | 2                   | 380021                   | Null     | No            | No                              |
| MAL2.2914 | 2                   | 501802                   | PFB0555c | No            | No                              |
| MAL2.3062 | 2                   | 549049                   | PFB0190c | Yes           | No                              |
| MAL2.3274 | 2                   | 585780                   | PFB0650w | Yes           | No                              |
| MAL2.3532 | 2                   | 650531                   | Null     | No            | No                              |
| MAL2.3551 | 2                   | 660994                   | PFB0703w | Yes           | Yes                             |
| MAL2.3840 | 2                   | 725641                   | PFB0820c | Yes           | Yes                             |
| MAL2.4312 | 2                   | 818134                   | Null     | No            | No                              |
| MAL2.4313 | 2                   | 819315                   | Null     | No            | No                              |
| MAL2.4543 | 2                   | 846392                   | Null     | No            | No                              |
| MAL2.4573 | 2                   | 848536                   | PFB0950w | Yes           | Yes                             |
| MAL3.1838 | 3                   | 213832                   | Null     | No            | No                              |
| MAL3.2220 | 3                   | 308854                   | Null     | No            | No                              |
| MAL3.2648 | 3                   | 392712                   | Null     | No            | No                              |
| MAL3.2912 | 3                   | 447298                   | PFC0435w | Yes           | Yes                             |
| MAL3.3175 | 3                   | 507959                   | PFC0505c | Yes           | Yes                             |
| MAL3.3213 | 3                   | 511564                   | PFC0510w | Yes           | Yes                             |

|           |   |         |            |     |     |
|-----------|---|---------|------------|-----|-----|
| MAL3.3652 | 3 | 619437  | PFC0640w   | Yes | yes |
| MAL3.3796 | 3 | 656356  | PFC0710w-a | No  | No  |
| MAL3.3815 | 3 | 662233  | Null       | No  | No  |
| MAL3.4155 | 3 | 748662  | PFC0050c   | Yes | Yes |
| MAL3.4358 | 3 | 816349  | Null       | No  | No  |
| MAL3.4439 | 3 | 848225  | PFC0905c   | Yes | Yes |
| MAL3.4573 | 3 | 889290  | Null       | No  | No  |
| MAL3.4644 | 3 | 908297  | Null       | No  | No  |
| MAL3.4961 | 3 | 982177  | Null       | No  | No  |
| MAL3.4987 | 3 | 995640  | PFC1065w   | Yes | Yes |
| MAL4.1520 | 4 | 110331  | PFD0080c   | Yes | Yes |
| MAL4.1525 | 4 | 110712  | PFC0380w   | Yes | No  |
| MAL4.1685 | 4 | 134538  | Null       | No  | No  |
| MAL4.2067 | 4 | 158452  | Null       | No  | No  |
| MAL4.2520 | 4 | 234468  | PFC0200c   | Yes | No  |
| MAL4.2588 | 4 | 245963  | Null       | No  | No  |
| MAL4.3297 | 4 | 399294  | PFD0390c   | Yes | No  |
| MAL4.3544 | 4 | 472279  | PFD0495c   | Yes | No  |
| MAL4.4003 | 4 | 551570  | PFD0610w   | Yes | Yes |
| MAL4.4969 | 4 | 686026  | PFD0735c   | Yes | Yes |
| MAL4.5256 | 4 | 755115  | PFD0830w   | Yes | Yes |
| MAL4.5260 | 4 | 755558  | PFD0830w   | Yes | Yes |
| MAL4.5386 | 4 | 782790  | PFD0840w   | Yes | Yes |
| MAL4.5679 | 4 | 843527  | PFD0900w   | Yes | No  |
| MAL4.5987 | 4 | 905957  | PFD0970c   | Yes | Yes |
| MAL4.7161 | 4 | 1053149 | Null       | No  | No  |
| MAL4.7367 | 4 | 1101563 | PFD1155w   | Yes | Yes |
| MAL4.8110 | 4 | 1142144 | Null       | No  | No  |
| MAL5.526  | 5 | 65071   | PFE0060w   | Yes | No  |
| MAL5.891  | 5 | 150460  | Null       | No  | No  |
| MAL5.1224 | 5 | 219220  | Null       | No  | No  |
| MAL5.1380 | 5 | 269459  | PFE0320w   | Yes | Yes |
| MAL5.1449 | 5 | 278013  | PFE0320w   | Yes | Yes |
| MAL5.1505 | 5 | 289918  | PFE0340c   | Yes | Yes |
| MAL5.1790 | 5 | 343384  | Null       | No  | No  |
| MAL5.1889 | 5 | 364200  | PFE0435c   | Yes | No  |
| MAL5.2034 | 5 | 382974  | PFE0450w   | Yes | Yes |
| MAL5.2081 | 5 | 396039  | PFE0465c   | Yes | Yes |
| MAL5.2309 | 5 | 482703  | Null       | No  | No  |
| MAL5.2353 | 5 | 504226  | PFE0570w   | Yes | No  |
| MAL5.2470 | 5 | 546121  | Null       | No  | No  |



|              |   |         |            |     |     |
|--------------|---|---------|------------|-----|-----|
| MAL5.3572    | 5 | 796712  | PFE0970w   | Yes | No  |
| MAL5.3637    | 5 | 810754  | Null       | No  | No  |
| MAL5.3953    | 5 | 958435  | PFE1150w   | Yes | Yes |
| MAL5.4016    | 5 | 980524  | Null       | No  | No  |
| MAL5.4167    | 5 | 1040130 | Null       | No  | No  |
| MAL5.4615    | 5 | 1113504 | PFE1325w   | Yes | Yes |
| MAL5.4913    | 5 | 1181711 | PFE1435c   | Yes | No  |
| MAL5.5469    | 5 | 1308985 | PFE1600w   | Yes | Yes |
| MAL6.595     | 6 | 74312   | Null       | No  | No  |
| MAL6.627     | 6 | 88829   | Null       | No  | No  |
| MAL6.847     | 6 | 148357  | PFF0175    | Yes | Yes |
| MAL6.1334    | 6 | 301723  | Null       | No  | No  |
| MAL6.1877    | 6 | 490306  | Null       | No  | No  |
| MAL6.1882    | 6 | 493449  | PFF0575c   | Yes | Yes |
| MAL6.2294    | 6 | 577117  | PFF0670w   | Yes | Yes |
| MAL6.2803    | 6 | 682442  | PFF0795w   | Yes | No  |
| MAL6.3497    | 6 | 769375  | PFF0885w   | Yes | No  |
| MAL6.3628    | 6 | 799787  | PFF0930w   | Yes | Yes |
| MAL6.3801    | 6 | 860702  | Null       | No  | No  |
| MAL6.4018    | 6 | 943311  | PFF1110c   | Yes | Yes |
| MAL6.4098    | 6 | 967410  | PFF1145c   | Yes | Yes |
| MAL6.4538    | 6 | 1116171 | PFF1350c   | Yes | No  |
| MAL6.4668    | 6 | 1183651 | Null       | No  | No  |
| MAL6.5107    | 6 | 1289574 | PFF1495w   | Yes | Yes |
| MAL7.1561    | 7 | 145763  | MAL7P1.7   | Yes | No  |
| MAL7.1980    | 7 | 225281  | MAL7P1.16  | Yes | Yes |
| MAL7.2219    | 7 | 285085  | Null       | No  | No  |
| MAL7.2220    | 7 | 287581  | Null       | No  | No  |
| MAL7.2307    | 7 | 307517  | Null       | No  | No  |
| MAL7.2405    | 7 | 339933  | Null       | No  | No  |
| MAL7.2631    | 7 | 417697  | MAL7P1.23  | Yes | Yes |
| MAL7.2888    | 7 | 470921  | PF07_0037  | Yes | Yes |
| MAL7.5309    | 7 | 665075  | MAL7P1.61  | Yes | No  |
| MAL7.5506    | 7 | 692568  | PF07_0053  | Yes | Yes |
| MAL7.5593    | 7 | 723752  | PF07_0058  | Yes | Yes |
| MAL7.5886    | 7 | 783281  | Null       | No  | No  |
| MAL7.6134    | 7 | 837487  | MAL7P1.89  | Yes | Yes |
| MAL7.6292    | 7 | 899602  | Null       | No  | No  |
| MAL7.6500    | 7 | 940109  | PF07_0085  | Yes | No  |
| MAL7.1416410 | 7 | 1416418 | MAL7P1.176 | yes | No  |
| MAL7.7454    | 7 | 1193678 | Null       | No  | No  |

|           |   |         |             |     |     |
|-----------|---|---------|-------------|-----|-----|
| MAL7.7642 | 7 | 1225730 | MAL7P1.152  | Yes | Yes |
| MAL7.7865 | 7 | 1289641 | MAL7P1.157a | Yes | Yes |
| MAL7.8102 | 7 | 1363687 | MAL7P1.187  | Yes | Yes |
| MAL7.8344 | 7 | 1440599 | PF07TR005   | No  | No  |
| MAL7.8353 | 7 | 1414328 | MAL7P1.176  | Yes | No  |
| MAL7.8356 | 7 | 1414598 | MAL7P1.176  | Yes | Yes |
| MAL7.8360 | 7 | 1414872 | MAL7P1.176  | Yes | Yes |
| MAL7.8369 | 7 | 1416729 | MAL7P1.176  | Yes | Yes |
| MAL8.1085 | 8 | 86747   | PF08_0137   | Yes | Yes |
| MAL8.1224 | 8 | 99179   | Null        | No  | No  |
| MAL8.1325 | 8 | 126761  | Null        | No  | No  |
| MAL8.1448 | 8 | 151154  | PF08_0132   | Yes | No  |
| MAL8.1620 | 8 | 197031  | Null        | No  | No  |
| MAL8.1757 | 8 | 233936  | RNAzID:4265 | No  | No  |
| MAL8.1900 | 8 | 265780  | MAL8P1.139  | Yes | Yes |
| MAL8.2100 | 8 | 337607  | MAL8P1.135  | Yes | No  |
| MAL8.2209 | 8 | 370855  | Null        | No  | No  |
| MAL8.2514 | 8 | 423288  | MAL8P1.122  | Yes | No  |
| MAL8.3752 | 8 | 547962  | MAL8P1.107  | Yes | Yes |
| MAL8.3768 | 8 | 551333  | PF08_0095   | Yes | Yes |
| MAL8.4068 | 8 | 682727  | PF08_0075   | Yes | Yes |
| MAL8.4553 | 8 | 846885  | MAL8P1.66   | Yes | Yes |
| MAL8.4660 | 8 | 884477  | MAL8P1.63   | Yes | Yes |
| MAL8.5093 | 8 | 1006923 | MAL8P1.43   | Yes | Yes |
| MAL8.6236 | 8 | 1311881 | PF08_0002   | Yes | Yes |
| MAL9.1364 | 9 | 150689  | Null        | No  | No  |
| MAL9.1631 | 9 | 254304  | PFI0260c    | Yes | Yes |
| MAL9.1733 | 9 | 288133  | Null        | No  | No  |
| MAL9.1875 | 9 | 334347  | PFI0330c    | Yes | Yes |
| MAL9.2306 | 9 | 466622  | PFI0495w    | Yes | Yes |
| MAL9.2415 | 9 | 512730  | PFI0550w    | Yes | Yes |
| MAL9.2768 | 9 | 604333  | PFI069c     | Yes | Yes |
| MAL9.2977 | 9 | 689167  | PFI0805w    | Yes | Yes |
| MAL9.3207 | 9 | 767141  | Null        | No  | No  |
| MAL9.3582 | 9 | 973974  | Null        | Yes | Yes |
| MAL9.3705 | 9 | 929691  | PFI1120c    | Yes | Yes |
| MAL9.4188 | 9 | 1077048 | PFI1300c    | Yes | No  |
| MAL9.4521 | 9 | 1178953 | PFI1445w    | Yes | Yes |
| MAL9.4543 | 9 | 1183700 | Null        | No  | No  |
| MAL9.4600 | 9 | 1199374 | PF09TR005   | No  | No  |
| MAL9.4694 | 9 | 1203641 | PFI1475w    | Yes | No  |

|            |    |         |             |     |     |
|------------|----|---------|-------------|-----|-----|
| MAL9.4717  | 9  | 1203920 | PF11475w    | Yes | Yes |
| MAL9.4752  | 9  | 1205108 | PF11475w    | Yes | Yes |
| MAL9.4775  | 9  | 1205725 | PF11475w    | Yes | No  |
| MAL9.4807  | 9  | 1206288 | PF11475w    | Yes | Yes |
| MAL9.4825  | 9  | 1206801 | PF11475w    | Yes | Yes |
| MAL9.5592  | 9  | 1428002 | PF11740c-a  | Yes | Yes |
| MAL10.1341 | 10 | 82376   | Null        | No  | No  |
| MAL10.1470 | 10 | 121129  | PF10_0028-a | Yes | Yes |
| MAL10.1743 | 10 | 222496  | PF10_0051   | Yes | No  |
| MAL10.2084 | 10 | 320664  | PF10TR002   | No  | No  |
| MAL10.2263 | 10 | 380845  | Null        | No  | No  |
| MAL10.2475 | 10 | 455426  | PF10_0115   | Yes | Yes |
| MAL10.4821 | 10 | 1182257 | PF10_0281   | Yes | Yes |
| MAL10.5105 | 10 | 1266136 | PF10_0308   | Yes | Yes |
| MAL10.5509 | 10 | 1377619 | PF10_0336   | Yes | No  |
| MAL10.6506 | 10 | 1440352 | Null        | No  | No  |
| MAL10.6660 | 10 | 1509425 | PF10_0373   | Yes | No  |
| MAL11.1470 | 11 | 120056  | PF11_0037   | Yes | Yes |
| MAL11.1490 | 11 | 123964  | PF11_0038   | Yes | Yes |
| MAL11.1524 | 11 | 138084  | Null        | No  | No  |
| MAL11.1653 | 11 | 185698  | PF11_0053   | Yes | No  |
| MAL11.1727 | 11 | 214600  | Null        | No  | No  |
| MAL11.3166 | 11 | 659734  | PF11_0178   | Yes | Yes |
| MAL11.3627 | 11 | 768606  | RNAzID:784  | No  | No  |
| MAL11.4786 | 11 | 1179874 | Null        | No  | No  |
| MAL11.4816 | 11 | 1191858 | PF11_0319   | Yes | Yes |
| MAL11.4921 | 11 | 1221389 | PF11_0326   | Yes | Yes |
| MAL11.5107 | 11 | 1274174 | Null        | No  | No  |
| MAL11.5262 | 11 | 1295157 | PF11_0344   | Yes | Yes |
| MAL11.5485 | 11 | 1384948 | PF11_0364   | Yes | Yes |
| MAL11.5918 | 11 | 1546730 | PF11TR006   | No  | No  |
| MAL11.6405 | 11 | 1715136 | Null        | No  | No  |
| MAL11.6421 | 11 | 1722533 | PF11_0442   | Yes | Yes |
| MAL11.6680 | 11 | 1791173 | PF11_0464   | Yes | Yes |
| MAL12.2148 | 12 | 83558   | PFL0055c    | Yes | No  |
| MAL12.2346 | 12 | 127973  | PFL0115w    | Yes | Yes |
| MAL12.2609 | 12 | 217434  | PFL0245w    | Yes | Yes |
| MAL12.3146 | 12 | 428463  | Null        | No  | No  |
| MAL12.3171 | 12 | 432868  | PFL0465c    | Yes | Yes |
| MAL12.3458 | 12 | 527375  | PFL0585w    | Yes | No  |
| MAL12.3752 | 12 | 646259  | PFL0770w    | Yes | No  |

|            |    |         |             |     |     |
|------------|----|---------|-------------|-----|-----|
| MAL12.4596 | 12 | 776377  | PF12TR008   | No  | No  |
| MAL12.4761 | 12 | 797285  | Null        | No  | No  |
| MAL12.4817 | 12 | 817723  | PFL0980w    | Yes | No  |
| MAL12.5266 | 12 | 971730  | PFL1145w    | Yes | No  |
| MAL12.5512 | 12 | 1074422 | PFL1280w    | Yes | Yes |
| MAL12.5831 | 12 | 1162017 | PFL1385c    | Yes | Yes |
| MAL12.6458 | 12 | 1325996 | PFL1540c    | Yes | Yes |
| MAL12.6805 | 12 | 1425744 | PFL1645w    | Yes | No  |
| MAL12.6980 | 12 | 1486964 | Null        | No  | No  |
| MAL12.7216 | 12 | 1552073 | PFL1800w    | Yes | No  |
| MAL12.7353 | 12 | 1589318 | PFL1855w    | Yes | yes |
| MAL12.7708 | 12 | 1691359 | Null        | No  | No  |
| MAL12.8354 | 12 | 1755389 | PFL1980c    | Yes | No  |
| MAL12.8381 | 12 | 1770575 | Null        | No  | No  |
| MAL12.8583 | 12 | 1834449 | PFL2110c    | No  | No  |
| MAL12.8666 | 12 | 1850403 | PFL2120w    | Yes | Yes |
| MAL12.9166 | 12 | 1995203 | PFL2335w    | Yes | Yes |
| MAL12.9383 | 12 | 2054073 | PFL2405c    | Yes | Yes |
| MAL12.9386 | 12 | 2054196 | PFL2405c    | Yes | Yes |
| MAL12.9638 | 12 | 2138722 | PFL2520c    | Yes | Yes |
| MAL12.9690 | 12 | 2162863 | PFL2545c    | Yes | Yes |
| MAL13.776  | 13 | 92674   | MAL13P1.60  | Yes | Yes |
| MAL13.808  | 13 | 103054  | PF13_0075   | Yes | No  |
| MAL13.1014 | 13 | 109962  | MAL13P1.62  | Yes | Yes |
| MAL13.1228 | 13 | 169982  | Null        | No  | No  |
| MAL13.1246 | 13 | 175971  | PF13_0019   | Yes | No  |
| MAL13.1518 | 13 | 256929  | MAL13P1.26  | No  | No  |
| MAL13.1745 | 13 | 351823  | Null        | No  | No  |
| MAL13.1784 | 13 | 376068  | MAL13P1.39  | Yes | Yes |
| MAL13.1978 | 13 | 430054  | Null        | No  | No  |
| MAL13.2283 | 13 | 512792  | PF13_0066   | Yes | Yes |
| MAL13.2457 | 13 | 596533  | MAL13P1.70  | Yes | Yes |
| MAL13.2681 | 13 | 714924  | PF13_0095   | Yes | No  |
| MAL13.2756 | 13 | 743761  | MAL13P1.93  | Yes | Yes |
| MAL13.2992 | 13 | 815532  | Null        | No  | No  |
| MAL13.3001 | 13 | 816155  | MAL13P1.105 | Yes | No  |
| MAL13.3095 | 13 | 854947  | Null        | No  | No  |
| MAL13.3251 | 13 | 901094  | MAL13P1.119 | Yes | Yes |
| MAL13.3651 | 13 | 1013875 | MAL13P1.113 | Yes | Yes |
| MAL13.4132 | 13 | 1174520 | MAL13P1.151 | Yes | Yes |
| MAL13.4972 | 13 | 1465989 | PF13_0201   | Yes | yes |

|            |    |         |             |     |     |
|------------|----|---------|-------------|-----|-----|
| MAL13.5481 | 13 | 1624489 | PF13_0223   | Yes | Yes |
| MAL13.5689 | 13 | 1696966 | MAL13P1.214 | Yes | No  |
| MAL13.5805 | 13 | 1742617 | MAL13P1.380 | Yes | Yes |
| MAL13.5880 | 13 | 1760453 | MAL13P1.390 | Yes | Yes |
| MAL13.6075 | 13 | 1809977 | PF13_0241   | Yes | No  |
| MAL13.6321 | 13 | 1872783 | PF13_0247   | Yes | Yes |
| MAL13.6616 | 13 | 1957902 | MAL13P1.246 | Yes | Yes |
| MAL13.6890 | 13 | 2034181 | MAL13P1.256 | Yes | Yes |
| MAL13.7128 | 13 | 2111329 | MAL13P1.268 | Yes | Yes |
| MAL13.7384 | 13 | 2236537 | Null        | No  | No  |
| MAL13.7598 | 13 | 2306330 | MAL13P1.286 | Yes | Yes |
| MAL13.7767 | 13 | 2362067 | Null        | No  | No  |
| MAL13.7922 | 13 | 2419099 | MAL13P1.301 | Yes | Yes |
| MAL13.8065 | 13 | 2465780 | MAL13P1.307 | Yes | Yes |
| MAL13.8177 | 13 | 2502209 | Null        | No  | No  |
| MAL13.8453 | 13 | 2567063 | PF13_0338   | Yes | Yes |
| MAL13.9059 | 13 | 2745068 | Null        | No  | No  |
| MAL14.693  | 14 | 39478   | Null        | No  | No  |
| MAL14.697  | 14 | 40095   | Null        | No  | No  |
| MAL14.742  | 14 | 44103   | Null        | No  | No  |
| MAL14.1056 | 14 | 126288  | PF14_0032   | Yes | Yes |
| MAL14.1066 | 14 | 130979  | Null        | No  | No  |
| MAL14.1236 | 14 | 192760  | Null        | No  | No  |
| MAL14.1446 | 14 | 290368  | Null        | No  | No  |
| MAL14.1774 | 14 | 417069  | Null        | No  | No  |
| MAL14.1943 | 14 | 480286  | Null        | No  | No  |
| MAL14.2522 | 14 | 666649  | Null        | No  | No  |
| MAL14.3677 | 14 | 1043837 | PF14_0247   | No  | No  |
| MAL14.3812 | 14 | 1106081 | PF14_0261   | Yes | No  |
| MAL14.4145 | 14 | 1199184 | PF14_0282   | Yes | No  |
| MAL14.4985 | 14 | 1484089 | Null        | No  | No  |
| MAL14.6443 | 14 | 1995720 | Null        | No  | No  |
| MAL14.6695 | 14 | 2077736 | Null        | No  | No  |
| MAL14.9187 | 14 | 2981922 | PF14_0700   | Yes | Yes |
| MAL14.9817 | 14 | 3154289 | PF14_0736   | Yes | Yes |

**Table S4.** SNPs under selection:  $F_{ST}$  estimates lie outside the 95%  $F_{ST}$  expected under neutrality, as determined using the program LOSITAN.  $He$ : expected heterozygosity.  $F_{ST}$ : Weir and Cockerham's estimate of  $F_{ST}$  (24).

| SNP name   | $He$     | $F_{ST}$ | <i>Probability (neutral <math>F_{ST}</math> &lt; Observed <math>F_{ST}</math>)</i> |
|------------|----------|----------|------------------------------------------------------------------------------------|
| MAL1.1303  | 0.121387 | 0.051391 | 1.60E-05                                                                           |
| MAL7.7642  | 0.43845  | 0.070871 | 1.22E-04                                                                           |
| MAL4.7367  | 0.442788 | 0.074168 | 1.59E-04                                                                           |
| MAL4.2067  | 0.312366 | 0.086747 | 4.03E-04                                                                           |
| MAL2.3062  | 0.378112 | 0.086751 | 4.03E-04                                                                           |
| MAL4.8110  | 0.270479 | 0.081374 | 0.001733                                                                           |
| MAL13.7767 | 0.162529 | 0.09972  | 0.007178                                                                           |
| MAL4.5987  | 0.270868 | 0.101402 | 0.00797                                                                            |
| MAL2.2488  | 0.506473 | 0.158745 | 0.008416                                                                           |
| MAL10.5509 | 0.359566 | 0.147461 | 0.010125                                                                           |
| MAL6.4018  | 0.197629 | 0.111366 | 0.013895                                                                           |
| MAL8.6236  | 0.483926 | 0.182324 | 0.018503                                                                           |
| MAL11.1490 | 0.453142 | 0.166348 | 0.020373                                                                           |
| MAL12.2148 | 0.212425 | 0.120795 | 0.021636                                                                           |
| MAL10.1341 | 0.48136  | 0.188129 | 0.022154                                                                           |
| MAL12.9638 | 0.29224  | 0.121619 | 0.022417                                                                           |
| MAL7.8356  | 0.427718 | 0.171058 | 0.023856                                                                           |
| MAL2.1769  | 0.385734 | 0.172551 | 0.025048                                                                           |
| MAL2.3551  | 0.459693 | 0.174227 | 0.026438                                                                           |
| MAL5.4913  | 0.326363 | 0.175245 | 0.02731                                                                            |
| MAL4.7161  | 0.225579 | 0.13183  | 0.033559                                                                           |
| MAL8.2209  | 0.118678 | 0.132731 | 0.034674                                                                           |
| MAL13.776  | 0.401434 | 0.185533 | 0.037348                                                                           |
| MAL3.3815  | 0.34558  | 0.189817 | 0.042224                                                                           |
| MAL11.1470 | 0.323725 | 0.193431 | 0.046676                                                                           |
| MAL7.1980  | 0.130963 | 0.141978 | 0.047343                                                                           |
| MAL13.5689 | 0.221963 | 0.620363 | 0.951603                                                                           |
| MAL12.9166 | 0.353901 | 0.548829 | 0.953478                                                                           |
| MAL4.5260  | 0.240366 | 0.654517 | 0.967414                                                                           |
| MAL12.2609 | 0.506565 | 0.526607 | 0.968698                                                                           |
| MAL4.5679  | 0.439729 | 0.575387 | 0.972076                                                                           |
| MAL12.7216 | 0.229995 | 0.680309 | 0.976347                                                                           |
| MAL7.6134  | 0.468506 | 0.549626 | 0.983171                                                                           |
| MAL3.3652  | 0.35902  | 0.600497 | 0.983527                                                                           |
| MAL12.5831 | 0.356427 | 0.605508 | 0.985255                                                                           |
| MAL9.2306  | 0.519905 | 0.555157 | 0.985625                                                                           |
| MAL12.5266 | 0.347714 | 0.616919 | 0.988621                                                                           |
| MAL9.1733  | 0.38197  | 0.618437 | 0.989015                                                                           |
| MAL9.4543  | 0.090447 | 0.603199 | 0.990506                                                                           |
| MAL3.2912  | 0.234921 | 0.751362 | 0.991254                                                                           |
| MAL13.3651 | 0.416391 | 0.630392 | 0.991727                                                                           |
| MAL4.4969  | 0.505643 | 0.575442 | 0.99216                                                                            |
| MAL9.2768  | 0.51926  | 0.576422 | 0.992395                                                                           |
| MAL9.2415  | 0.380653 | 0.635136 | 0.992631                                                                           |

---

|            |          |          |          |
|------------|----------|----------|----------|
| MAL5.3953  | 0.416987 | 0.654534 | 0.995492 |
| MAL8.2100  | 0.510676 | 0.597562 | 0.996149 |
| MAL10.2475 | 0.498597 | 0.598757 | 0.996299 |
| MAL9.4752  | 0.434049 | 0.666855 | 0.996754 |
| MAL6.1877  | 0.510061 | 0.613501 | 0.997765 |
| MAL8.1085  | 0.41573  | 0.684454 | 0.998016 |
| MAL8.3752  | 0.401235 | 0.696965 | 0.998625 |
| MAL5.2034  | 0.471365 | 0.629083 | 0.99872  |
| MAL6.4538  | 0.447026 | 0.700233 | 0.998754 |
| MAL7.5886  | 0.474045 | 0.635379 | 0.998985 |
| MAL13.3095 | 0.523445 | 0.658726 | 0.999586 |
| MAL12.4761 | 0.396389 | 0.737227 | 0.99962  |
| MAL13.2457 | 0.334079 | 0.742435 | 0.999682 |
| MAL7.2888  | 0.482507 | 0.674483 | 0.999781 |
| MAL4.3544  | 0.347656 | 0.771762 | 0.999891 |
| MAL7.6500  | 0.39161  | 0.777817 | 0.999913 |
| MAL3.4439  | 0.418535 | 0.798566 | 0.999962 |
| MAL8.5093  | 0.52619  | 0.736648 | 0.999986 |
| MAL13.6321 | 0.342857 | 0.824353 | 0.999988 |
| MAL13.2992 | 0.351889 | 0.840393 | 0.999994 |
| MAL8.4068  | 0.516092 | 0.755806 | 0.999994 |
| MAL13.6075 | 0.333754 | 0.841598 | 0.999995 |
| MAL6.1882  | 0.470389 | 0.77092  | 0.999997 |
| MAL5.4016  | 0.434497 | 0.875834 | 0.999999 |
| MAL8.3768  | 0.487084 | 0.801964 | 0.999999 |
| MAL13.7922 | 0.508365 | 0.799308 | 0.999999 |
| MAL6.4668  | 0.447751 | 0.88731  | 1        |
| MAL5.1449  | 0.52904  | 0.828028 | 1        |

---

**Table S5.** Expected heterozygosity ( $H_s$ ) computed for each of three datasets: MS, MS + and SNP. (Loci under selection are not included.) NA: Not available. \*The two Angolan (Ang1 and Ang2) and also the two Benin (Ben1 and Ben2) populations were combined in the SNP analysis. P-values of Student  $t$ -test on logarithms of heterozygosity between continents are given at the bottom of the table. Ang1 and Ang2: Angola, Ben1 and Ben2 : Benin, Bra: Brazil, Bol: Bolivia, Cam: Cameroon, Cmp: Camopi (French Guiana), Col1 and Col2: Colombia, Con1: Republic of Congo, Con2: Democratic Republic of Congo, Dji: Djibouti, Gab: Gabon, Ira: Iran, Lao: Laos, Mad: Madagascar, Mar: Maripasoula (French Guiana), Mya: Myanmar, Nig: Niger, Per: Peru, PNG1 and PNG2: Papua New Guinea, Sen: Senegal, Tai1-Tai5: Thailand, Trs: Trois Sauts (French Guiana), Uga: Uganda, Ven: Venezuela, Zim: Zimbabwe.

| Location                           | $H_s$ "MS"    | $H_s$ "MS +"   | $H_s$ "SNP"   |
|------------------------------------|---------------|----------------|---------------|
| Ang1                               | 0.73          | 0.79           | 0.20*         |
| Ang2                               | 0.73          | 0.75           | NA            |
| Ben1                               | 0.72          | 0.76           | 0.23*         |
| Ben2                               | 0.73          | 0.76           | NA            |
| Cam                                | 0.77          | 0.80           | NA            |
| Con1                               | 0.70          | 0.73           | 0.22          |
| Con2                               | NA            | 0.85           | NA            |
| Dji                                | 0.54          | 0.57           | NA            |
| Gab                                | 0.75          | 0.79           | 0.21          |
| Mad                                | 0.75          | 0.77           | 0.24          |
| Nig                                | 0.75          | 0.79           | NA            |
| Sen                                | 0.74          | 0.78           | NA            |
| Uga                                | NA            | 0.83           | NA            |
| Zim                                | NA            | 0.84           | NA            |
| <b>Mean (Africa)</b>               | <b>0.719</b>  | <b>0.77</b>    | <b>0.220</b>  |
| Ira                                | 0.63          | 0.73           | 0.21          |
| Lao                                | 0.71          | 0.74           | 0.20          |
| Mya                                | 0.70          | 0.74           | 0.26          |
| PNG1                               | NA            | 0.75           | NA            |
| PNG2                               | NA            | 0.76           | NA            |
| Tai1                               | 0.63          | 0.70           | NA            |
| Tai2                               | 0.60          | 0.68           | 0.19          |
| Tai3                               | 0.57          | 0.66           | NA            |
| Tai4                               | 0.50          | 0.56           | NA            |
| Tai5                               | NA            | 0.63           | NA            |
| <b>Mean (Asia)</b>                 | <b>0.620</b>  | <b>0.70</b>    | <b>0.215</b>  |
| Bol                                | NA            | 0.36           | NA            |
| Bra                                | NA            | 0.42           | NA            |
| Cmp                                | 0.19          | 0.17           | 0.10          |
| Col1                               | 0.22          | 0.26           | 0.07          |
| Col2                               | NA            | 0.42           | NA            |
| Mar                                | 0.41          | 0.42           | 0.12          |
| Per                                | 0.40          | 0.48           | 0.18          |
| Trs                                | 0.15          | 0.11           | 0.10          |
| Ven                                | 0.46          | 0.40           | 0.18          |
| <b>Mean (South America)</b>        | <b>0.305</b>  | <b>0.32</b>    | <b>0.13</b>   |
| <b>P-value (Africa vs Asia)</b>    | <b>0.018</b>  | <b>0.015</b>   | <b>0.66</b>   |
| <b>P-value (Africa vs America)</b> | <b>0.0042</b> | <b>0.00054</b> | <b>0.0088</b> |
| <b>P-value (Asia vs America)</b>   | <b>0.0083</b> | <b>0.0012</b>  | <b>0.011</b>  |



**Table S6.** Probabilities (with 95% confidence intervals in brackets) for three invasion scenarios inferred from ABC analyses. For each simulation, the selected scenario (shaded cell) was the one with the highest probability value. Confidence in scenario choice was evaluated from 500 randomly constructed simulated datasets. Median divergence time estimates (in number of generations with 95% confidence intervals) are also given except for cases where no scenario could be chosen with confidence. \*Indicates populations where ABC analyses were performed on seven microsatellite loci (MS+ dataset excluding loci suspected to be under selection). For the other pairs of populations, analyses were performed on ten microsatellite markers (MS dataset excluding loci suspected to be under selection). Bol: Bolivia, Bra: Brazil, Cmp: Camopi (French Guiana), Col1, Col2: Colombia, Mar: Maripassoula (French Guiana), Trs: Trois Sauts (French Guiana). The “northern cluster” contains the two populations Col1 and Col2, whereas the “southern cluster” comprises the populations Bol, Bra, Cmp, Mar and Trs.

| Population 1       | Population 2       | Scenario A                  | Scenario B                   | Scenario C                  | Divergence time estimates in generations                               |
|--------------------|--------------------|-----------------------------|------------------------------|-----------------------------|------------------------------------------------------------------------|
| Northern Cluster * | Southern Cluster * | 0.5835<br>[0.5689 : 0.5980] | 0.08245<br>[0.0804 : 0.0845] | 0.3340<br>[0.3257 : 0.3424] | t1:3710 [756 : 8450]<br>t2:5450 [2400 : 9860]                          |
| Southern Cluster * | Northern Cluster * | 0.6922<br>[0.6749 : 0.7094] | 0.0658<br>[0.0641 : 0.0675]  | 0.2420<br>[0.2360 : 0.2480] | t1:2380 [392 : 7530]<br>t2:6860 [2170 : 9860]                          |
| Col 1              | Cmp                | 0.3218<br>[0.3138 : 0.3299] | 0.2284<br>[0.2227 : 0.2341]  | 0.4498<br>[0.4385 : 0.4610] | t1:2220 [153 : 6930]<br>t2:5450 [1790 : 8970]<br>t3 :6710 [2210 :9830] |
|                    | Trs                | 0.5510<br>[0.5372 : 0.5648] | 0.1500<br>[0.1462 : 0.1537]  | 0.2990<br>[0.2915 : 0.3065] | t1:3070 [280 : 8300]<br>t2:6090 [1810 : 9700]                          |
|                    | Mar                | 0.7436<br>[0.7250 : 0.7630] | 0.0886<br>[0.0864 : 0.0908]  | 0.1678<br>[0.1636 : 0.1720] | t1:2970 [251 : 7820]<br>t2:5390 [1540 : 9640]                          |
|                    | Col 2 *            | 0                           | 0.9252<br>[0.9021 : 0.9484]  | 0.0747<br>[0.0728 : 0.0766] | t1:608 [73 : 3020]<br>t2:4520 [545 : 9620]                             |
|                    | Bol *              | 0.4076<br>[0.3974 : 0.4178] | 0.0797<br>[0.0777 : 0.0817]  | 0.5126<br>[0.4998 : 0.5254] | t1:2260 [184 : 6960]<br>t2:5570 [1840 : 9090]<br>t3:7390 [2870 : 9880] |
|                    | Bra *              | 0.4988<br>[0.4863 : 0.5113] | 0.0690<br>[0.0672 : 0.0707]  | 0.4322<br>[0.4213 : 0.4430] | t1:2760 [200 : 7900]<br>t2:5910 [1730 : 9720]                          |
| Col 2 *            | Cmp *              | 0.3468<br>[0.3381 : 0.3554] | 0.2026<br>[0.1975 : 0.2076]  | 0.4506<br>[0.4393 : 0.4618] | t1:3050 [335 : 7480]<br>t2:5750 [2020 : 9110]<br>t3:7580 [3020 :9880]  |
|                    | Trs *              | 0.4272<br>[0.4165 : 0.4379] | 0.1403<br>[0.1368 : 0.1438]  | 0.4325<br>[0.4218 : 0.4433] | --                                                                     |
|                    | Mar *              | 0.4368<br>[0.4259 : 0.4478] | 0.1228<br>[0.1197 : 0.1259]  | 0.4404<br>[0.4293 : 0.4514] | --                                                                     |
|                    | Col 1 *            | 0                           | 0.9136<br>[0.8907 : 0.9364]  | 0.0864<br>[0.0842 : 0.0885] | t1:416 [53 : 2270]<br>t2:4660 [561 : 9670]                             |
|                    | Bol *              | 0.4965<br>[0.4841 : 0.5089] | 0.1238<br>[0.1207 : 0.1269]  | 0.3797<br>[0.3702 : 0.3891] | t1:2870 [293 : 7940]<br>t2:6160 [1930 : 9770]                          |
|                    | Bra *              | 0.5403<br>[0.5267 : 0.5538] | 0.0873<br>[0.0851 : 0.0895]  | 0.3723<br>[0.3630 : 0.3817] | t1:2470 [201 : 7710]<br>t2:5920 [1740 : 9740]                          |
| Cmp                | Col 1              | 0.6531<br>[0.6367 : 0.6694] | 0.0890<br>[0.0868 : 0.0912]  | 0.2580<br>[0.2514 : 0.2643] | t1:2340 [172 : 7410]<br>t2:5980 [1820 : 9720]                          |
|                    | Trs                | 0                           | 0.9994<br>[0.9744 : 1.024]   | 0.0006<br>[0.0005 : 0.0007] | t1:612 [74 : 2770]<br>t2:5830 [771 : 9800]                             |
|                    | Mar                | 0                           | 0.7048<br>[0.6871 : 0.7224]  | 0.2952<br>[0.2878 : 0.3026] | t1:985 [118 : 3860]<br>t2:3950 [470 : 9560]                            |
|                    | Col 2 *            | 0.6275<br>[0.6118 : 0.6432] | 0.0383<br>[0.0373:0.0756]    | 0.3342<br>[0.3258 : 0.3426] | t1:1910 [156 : 7180]<br>t2:6150 [1870 : 9740]                          |

|         |         |                             |                             |                             |                                               |
|---------|---------|-----------------------------|-----------------------------|-----------------------------|-----------------------------------------------|
|         | Bol *   | 0                           | 0.78072<br>[0.7612:0.8002]  | 0.2193<br>[0.2138 : 0.2248] | t1:486 [51 : 2720]<br>t2:4400 [424 : 9670]    |
|         | Bra *   | 0                           | 0.5408<br>[0.5273:0.5543]   | 0.4592<br>[0.4477 : 0.4706] | t1:511 [49 : 2930]<br>t2:3740 [347 : 9580]    |
| Trs     | Col 1   | 0.8314<br>[0.8107 : 0.8523] | 0.0364 [0.0355 :<br>0.0373] | 0.1321<br>[0.1288 : 0.1354] | t1:2550 [196 : 7580]<br>t2:6340 [2050 : 9760] |
|         | Cmp     | 0                           | 0.9983<br>[0.9734 : 1.023]  | 0.0017<br>[0.0015 : 0.0017] | t1:663 [80 : 2950]<br>t2:5750 [750 : 9790]    |
|         | Mar     | 0                           | 0.8691<br>[0.8473 : 0.8908] | 0.1309<br>[0.1276 : 0.1342] | t1:537 [70 : 2430]<br>t2:4330 [489 : 9620]    |
|         | Col 2 * | 0.5278<br>[0.5148 : 0.5412] | 0.0692<br>[0.0675 : 0.0710] | 0.4028<br>[0.3927 : 0.4185] | t1:3050 [231 : 8140]<br>t2:6350 [2030 : 9770] |
|         | Bol *   | 0                           | 0.9561<br>[0.9083 : 1.00]   | 0.04388<br>[0.0417:0.0460]  | t1:408 [55 : 2160]<br>t2:5520 [741 : 9770]    |
|         | Bra *   | 0                           | 0.9008<br>[0.8728 : 0.9233] | 0.0992<br>[0.0967 : 0.1017] | t1:709 [83 : 3320]<br>t2:5600 [781 : 9780]    |
|         | Mar     | Col 1                       | 0.7882<br>[0.7685 : 0.8079] | 0.0536<br>[0.0523 : 0.0550] | 0.1582<br>[0.1542 : 0.1621]                   |
| Cmp     |         | 0                           | 0.7089<br>[0.6912 : 0.7266] | 0.2911<br>[0.2838 : 0.2984] | t1:702 [85 : 3020]<br>t2:3960 [504 : 9570]    |
| Trs     |         | 0                           | 0.8393<br>[0.8183 : 0.8603] | 0.1607<br>[0.1567 : 0.1647] | t1:332 [42 : 1730]<br>t2:4220 [491 : 9610]    |
| Col 2 * |         | 0.4895<br>[0.4772 : 0.5017] | 0.1089<br>[0.1061 : 0.1116] | 0.4019<br>[0.3916 : 0.4117] | t1:1760 [107 : 7320]<br>t2:4250 [243 : 9680]  |
| Bol *   |         | 0                           | 0.9079<br>[0.8852 : 0.9306] | 0.0921<br>[0.0898 : 0.0944] | t1:336 [47 : 1800]<br>t2:5050 [400 : 9720]    |
| Bra *   |         | 0                           | 0.9005<br>[0.8780 : 0.9230] | 0.0995<br>[0.0970 : 0.1020] | t1:396 [49 : 2070]<br>t2:5060 [397 : 9730]    |
| Bol *   |         | Col 1 *                     | 0.4951<br>[0.4827 : 0.5075] | 0.1016<br>[0.0990 : 0.1041] | 0.4033<br>[0.3932 : 0.4139]                   |
|         | Cmp *   | 0                           | 0.8834<br>[0.8613 : 0.9055] | 0.1166<br>[0.1137 : 0.1195] | t1:819 [98 : 3910]<br>t2:5710 [709 : 9800]    |
|         | Trs *   | 0                           | 0.9813<br>[0.9568 : 1.005]  | 0.0187<br>[0.0182 : 0.0192] | t1:351 [50 : 1900]<br>t2:6130 [926 : 9810]    |
|         | Mar *   | 0                           | 0.9470<br>[0.9233 : 0.9707] | 0.0530<br>[0.0517 : 0.0543] | t1:505 [72 : 2520]<br>t2:5260 [650 : 9740]    |
|         | Col 2 * | 0.6574<br>[0.6409 : 0.6738] | 0.0529<br>[0.0514 : 0.0540] | 0.2900<br>[0.2827 : 0.2972] | t1:2330 [191 : 7590]<br>t2:6400 [2040 : 9780] |
|         | Bra *   | 0                           | 0.7575<br>[0.7385 : 0.7764] | 0.2425<br>[0.2364 : 0.2485] | t1:348 [35 : 2080]<br>t2:4640 [471 : 9690]    |
| Bra *   | Col 1 * | 0.6281<br>[0.6124 : 0.6438] | 0.0855<br>[0.0833 : 0.0876] | 0.2864<br>[0.2792 : 0.2935] | t1:3040 [265 : 8070]<br>t2:6350 [1960 : 9790] |
|         | Cmp *   | 0                           | 0.8799<br>[0.8578 : 0.9019] | 0.1202<br>[0.1172 : 0.1231] | t1:909 [115 : 4210]<br>t2:6030 [855 : 9810]   |
|         | Trs *   | 0                           | 0.9647<br>[0.9405 : 0.9887] | 0.0353<br>[0.0344 : 0.0362] | t1:448 [61 : 2370]<br>t2:6100 [936 : 9810]    |
|         | Mar *   | 0                           | 0.9400<br>[0.9163 : 0.9633] | 0.0602<br>[0.0587 : 0.0617] | t1:441 [62 : 2330]<br>t2:5320 [655 : 9740]    |
|         | Col 2 * | 0.6468<br>[0.6306 : 0.6630] | 0.0681<br>[0.0664 : 0.0698] | 0.2850<br>[0.2780 : 0.2921] | t1:2660 [234 : 7860]<br>t2:6100 [936 : 9810]  |
|         | Bol *   | 0                           | 0.9064<br>[0.8837 : 0.9290] | 0.0936<br>[0.0912 : 0.0960] | t1:352 [41 : 2020]<br>t2:5730 [716 : 9790]    |

**Table S7.** Range of prior distributions of the parameters used in the ABC analyses.  $Ne S$  is the effective population size of the source.  $Nebt1$ ,  $Nebt2$  and  $Nebt3$  are the effective population sizes during bottlenecks.  $Ne 1$  and  $Ne 2$  are the effective population sizes after population expansion.  $t1$ ,  $t2$  and  $t3$  are divergence times expressed in number of generations before present.  $\mu$  is the single locus mutation rate.  $db$  corresponds to the duration of the bottleneck.

| <i>Parameters</i>                       | <i>Prior (lower bound)</i> | <i>Prior (upper bound)</i> |
|-----------------------------------------|----------------------------|----------------------------|
| <i>Ne S</i>                             | 10                         | 100000                     |
| <i>Ne 1</i>                             | 10                         | 10000                      |
| <i>Ne 2</i>                             | 10                         | 10000                      |
| <i>Nebt1</i>                            | 10                         | 1000                       |
| <i>Nebt2</i>                            | 10                         | 1000                       |
| <i>Nebt3</i>                            | 10                         | 1000                       |
| <i>t1</i>                               | 1                          | 10000                      |
| <i>t2</i>                               | 1                          | 10000                      |
| <i>t3</i>                               | 1                          | 10000                      |
| <i>db</i>                               | 1                          | 100                        |
| <b>Mutation rate (<math>\mu</math>)</b> | $5.10^{-5}$                | $5.10^{-3}$                |
